# Supplementary material for: The burden of disease in Russia from 1980 to 2016: a systematic analysis for the Global Burden of Disease Study 2016
Source: PubMed Central journal article supplement (PMC6172188; doi:10.1016/s0140-6736(18)31485-5), 2018-09-29
Supplement: mmc1.pdf [file mmc1.pdf]

# THE LANCET

## **Supplementary appendix**

This appendix formed part of the original submission and has been peer reviewed. We post it as supplied by the authors.

Supplement to: GBD 2016 Russia Collaborators. The burden of disease in Russia from 1980 to 2016: a systematic analysis for the Global Burden of Disease Study 2016. *Lancet* 2018; published online Aug 30. [http://dx.doi.org/10.1016/S0140-6736\(18\)31485-5](http://dx.doi.org/10.1016/S0140-6736(18)31485-5).

Trends in life expectancy at birth for Russia and comparator countries, both sexes combined, 1980–2016

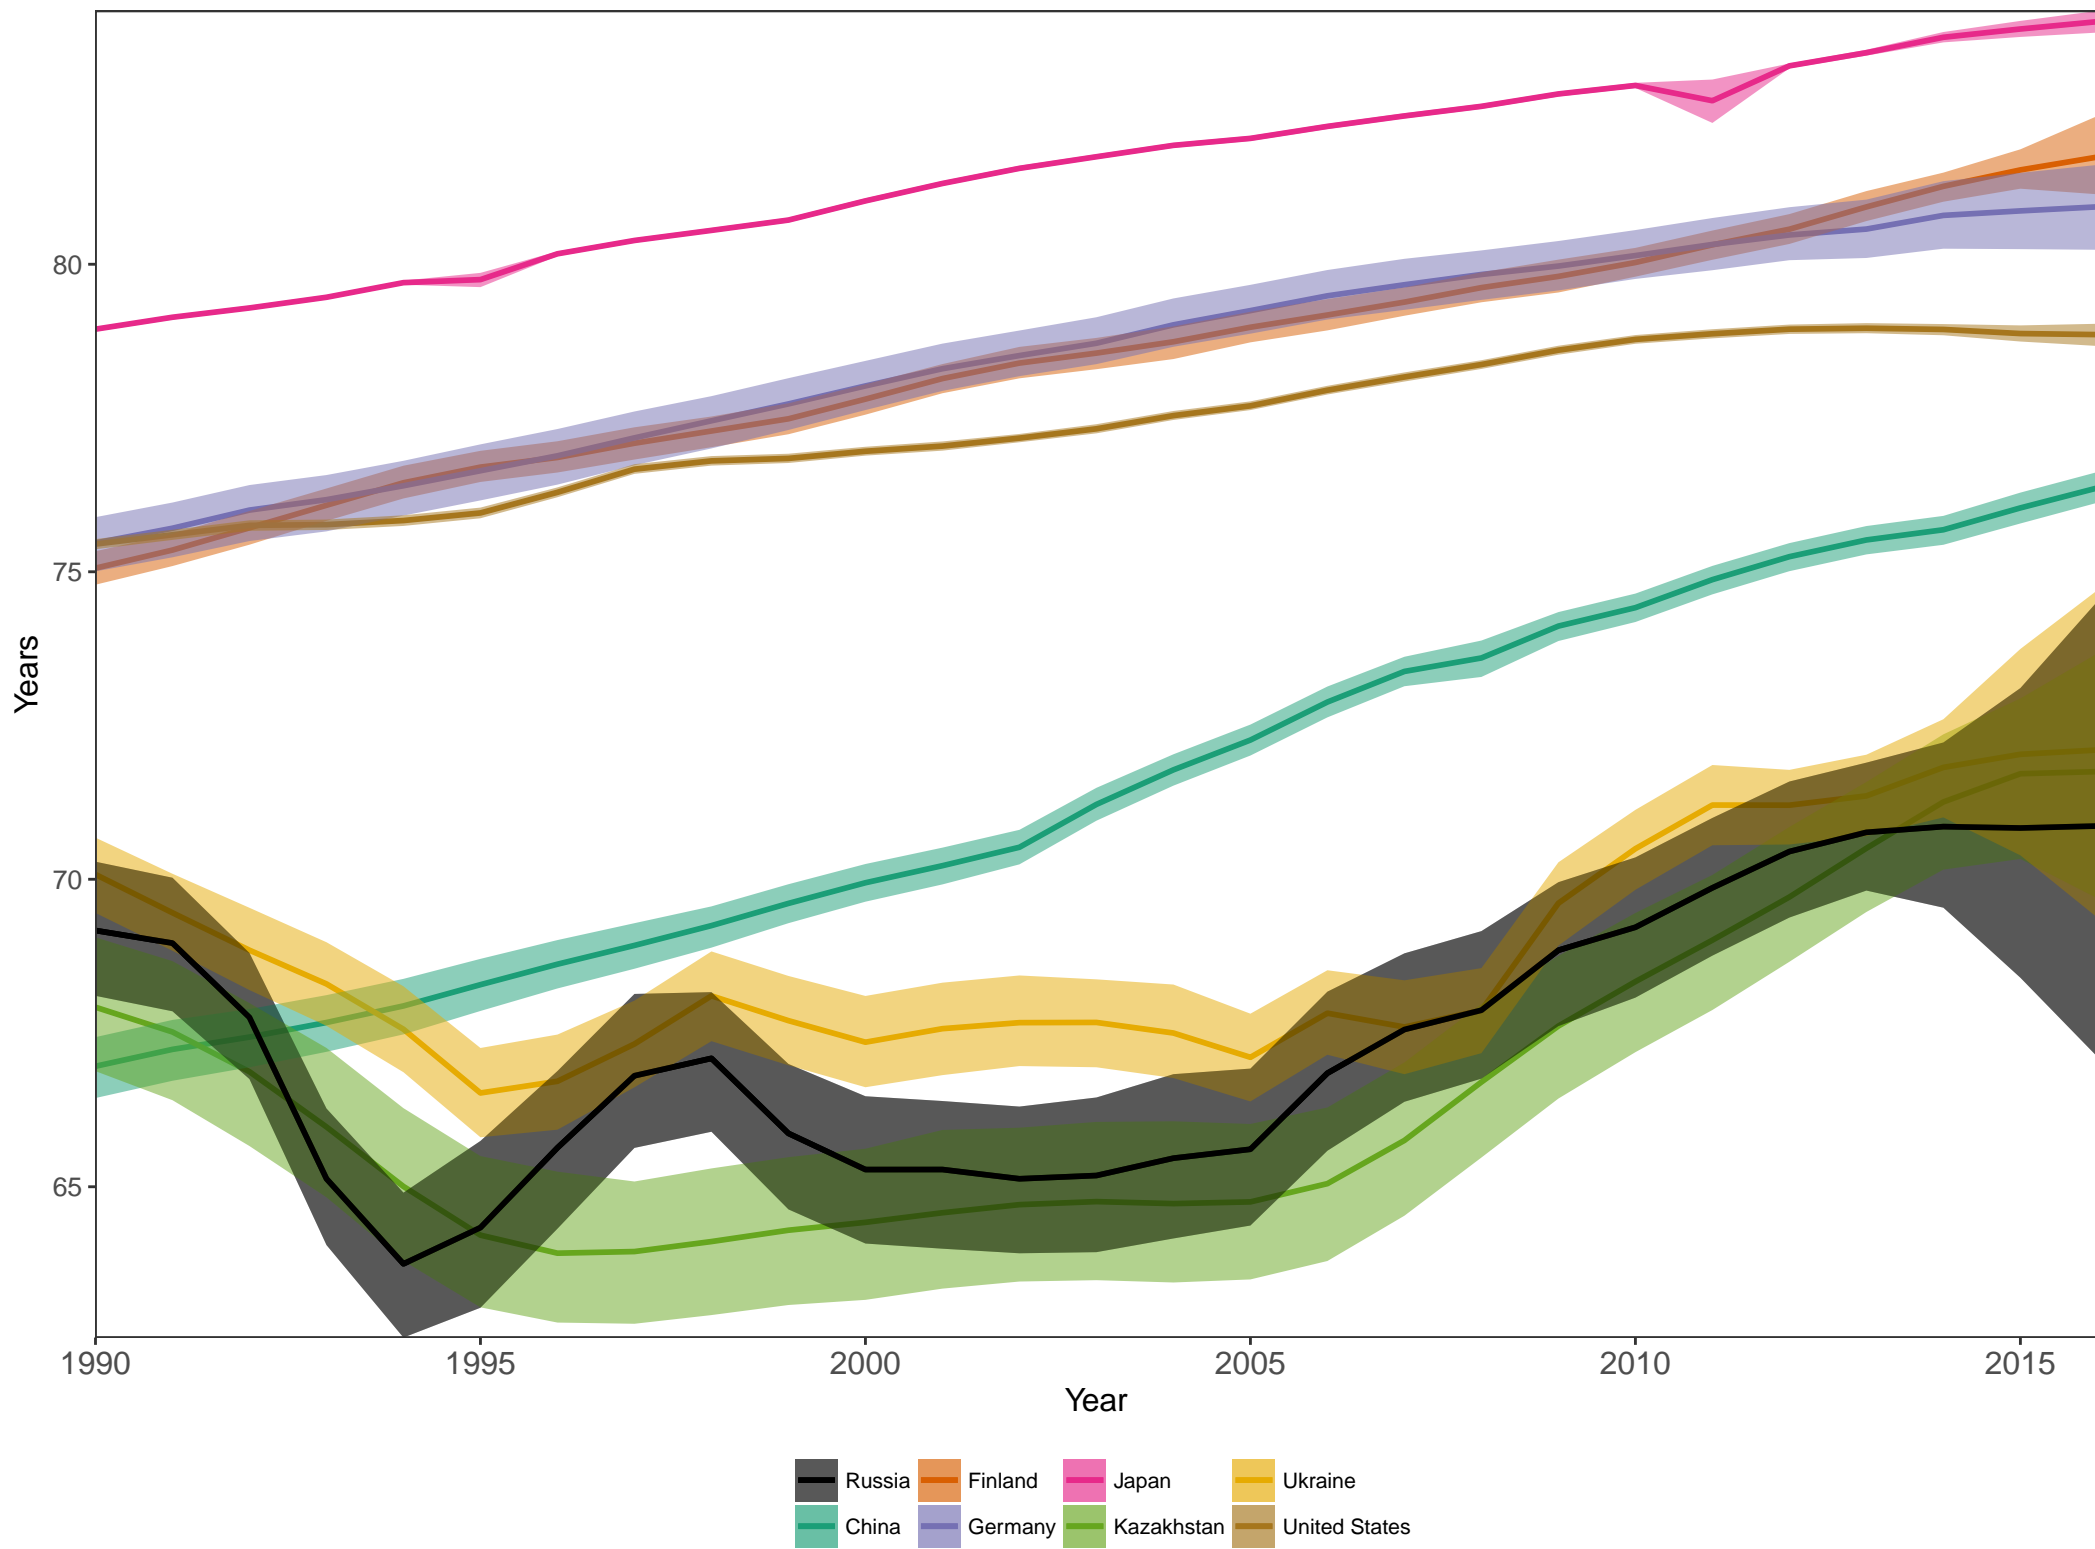

Trends in age-standardised all-cause rate of DALYs for Russia and comparator countries, both sexes combined 1980–2016

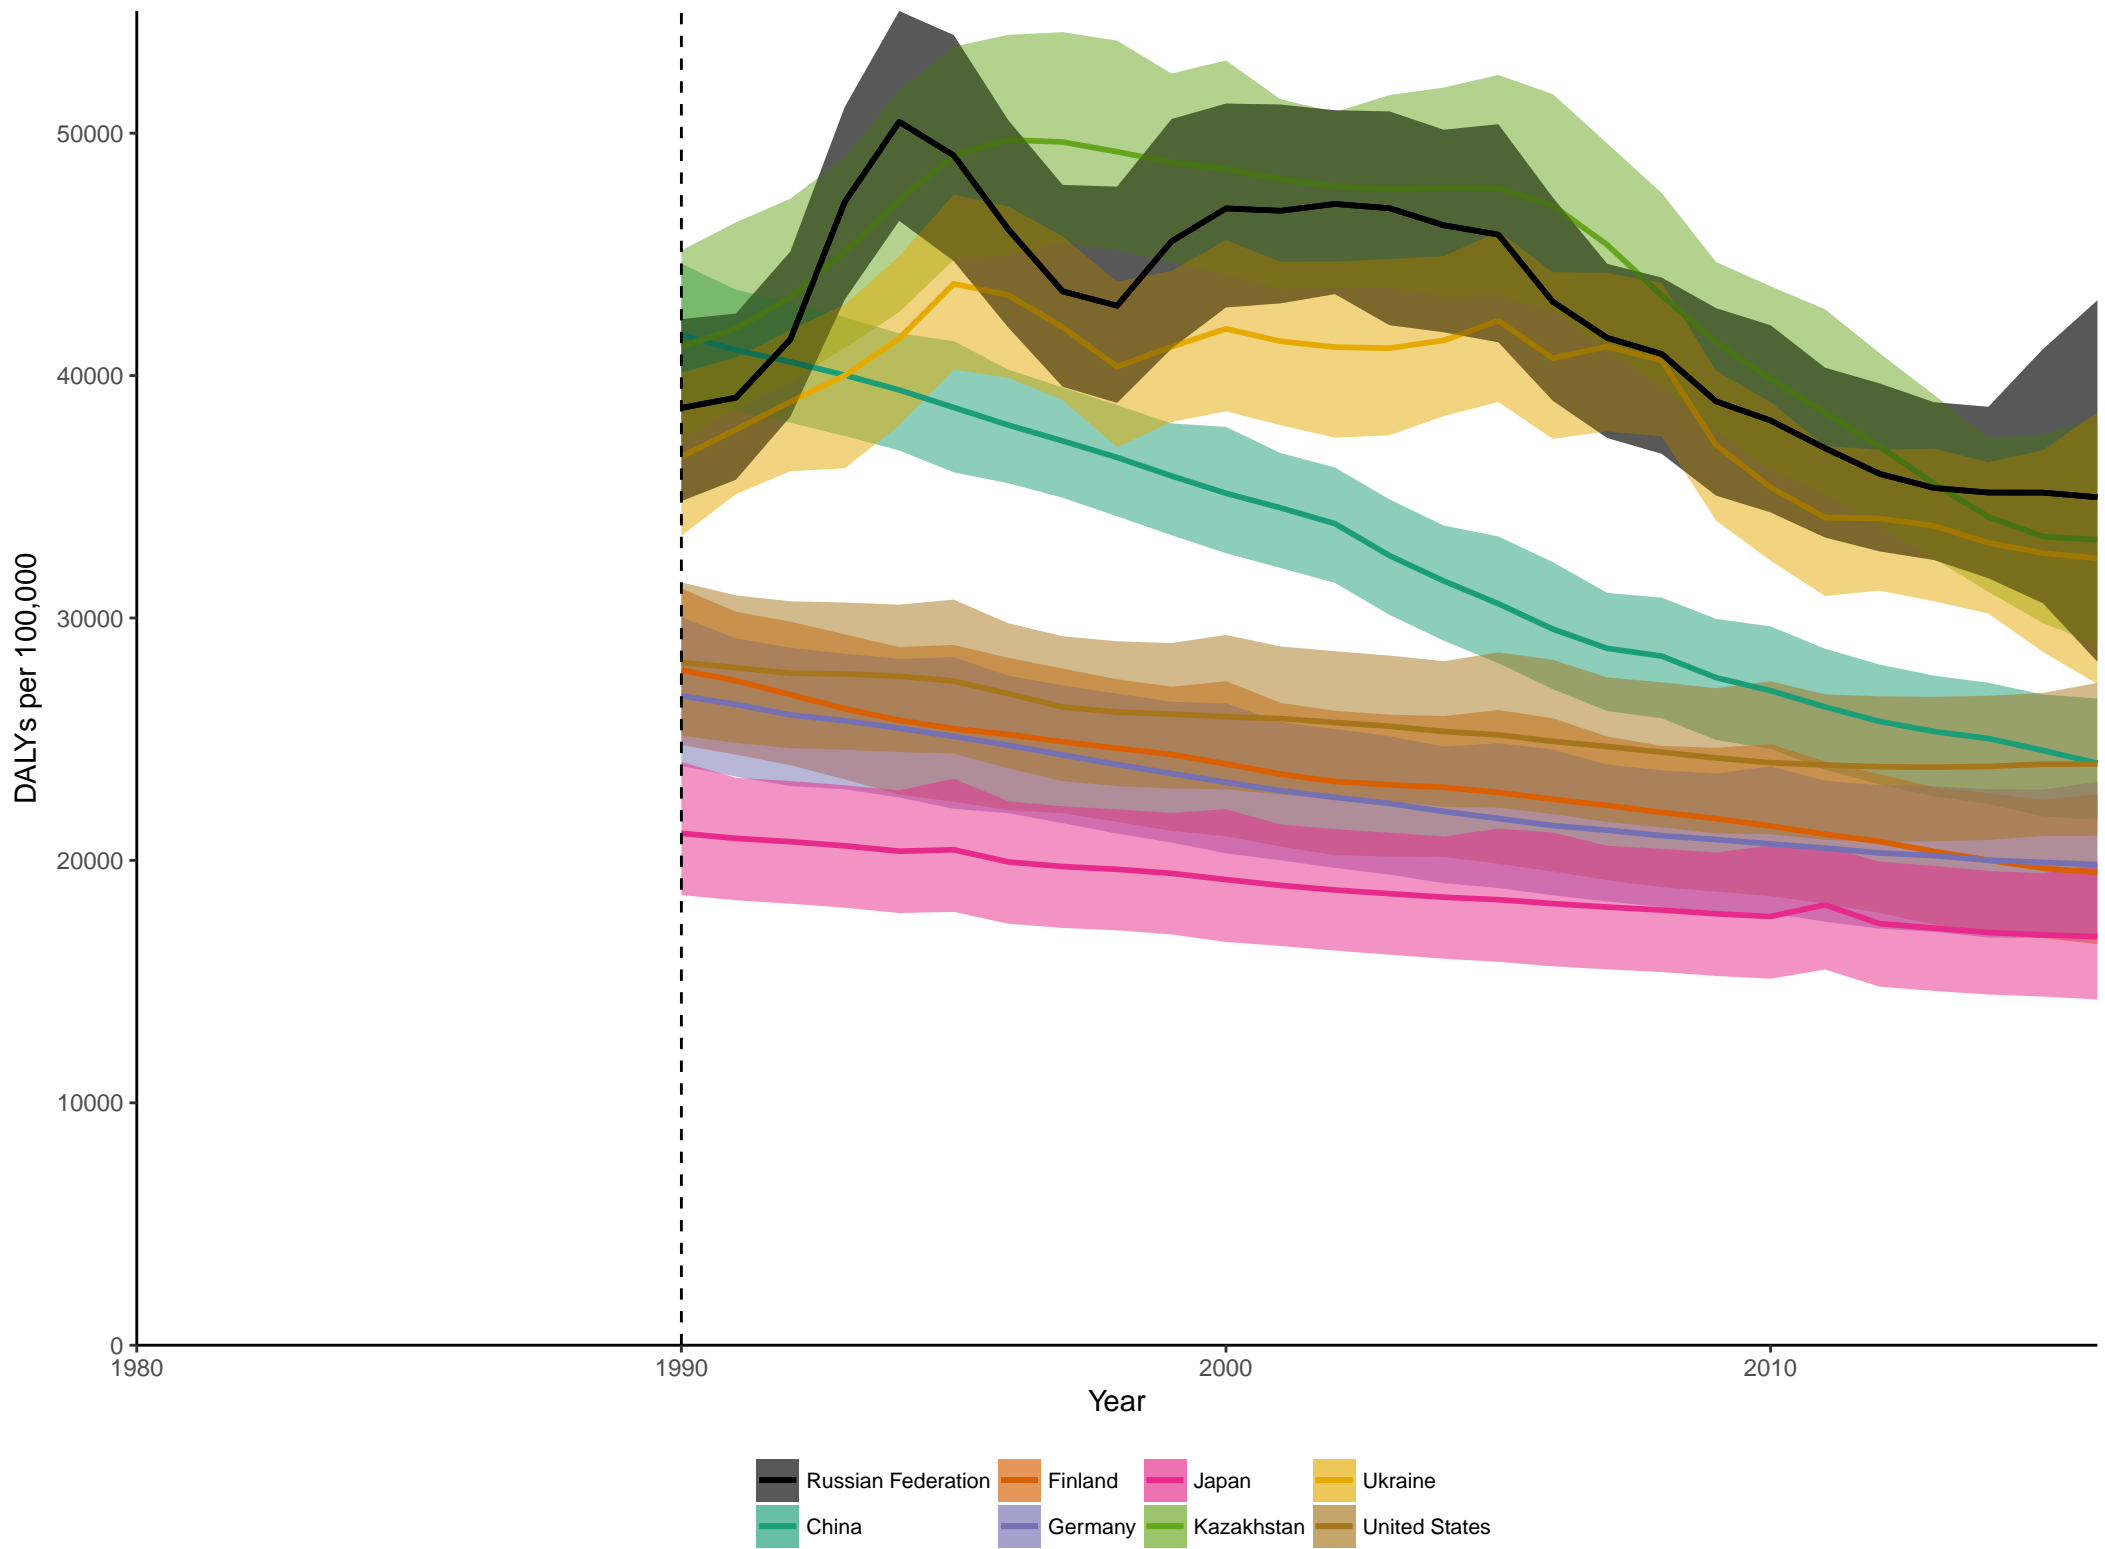

Trends in age-standardised all-cause rate of mortality for Russia and comparator countries, both sexes combined 1980–2016

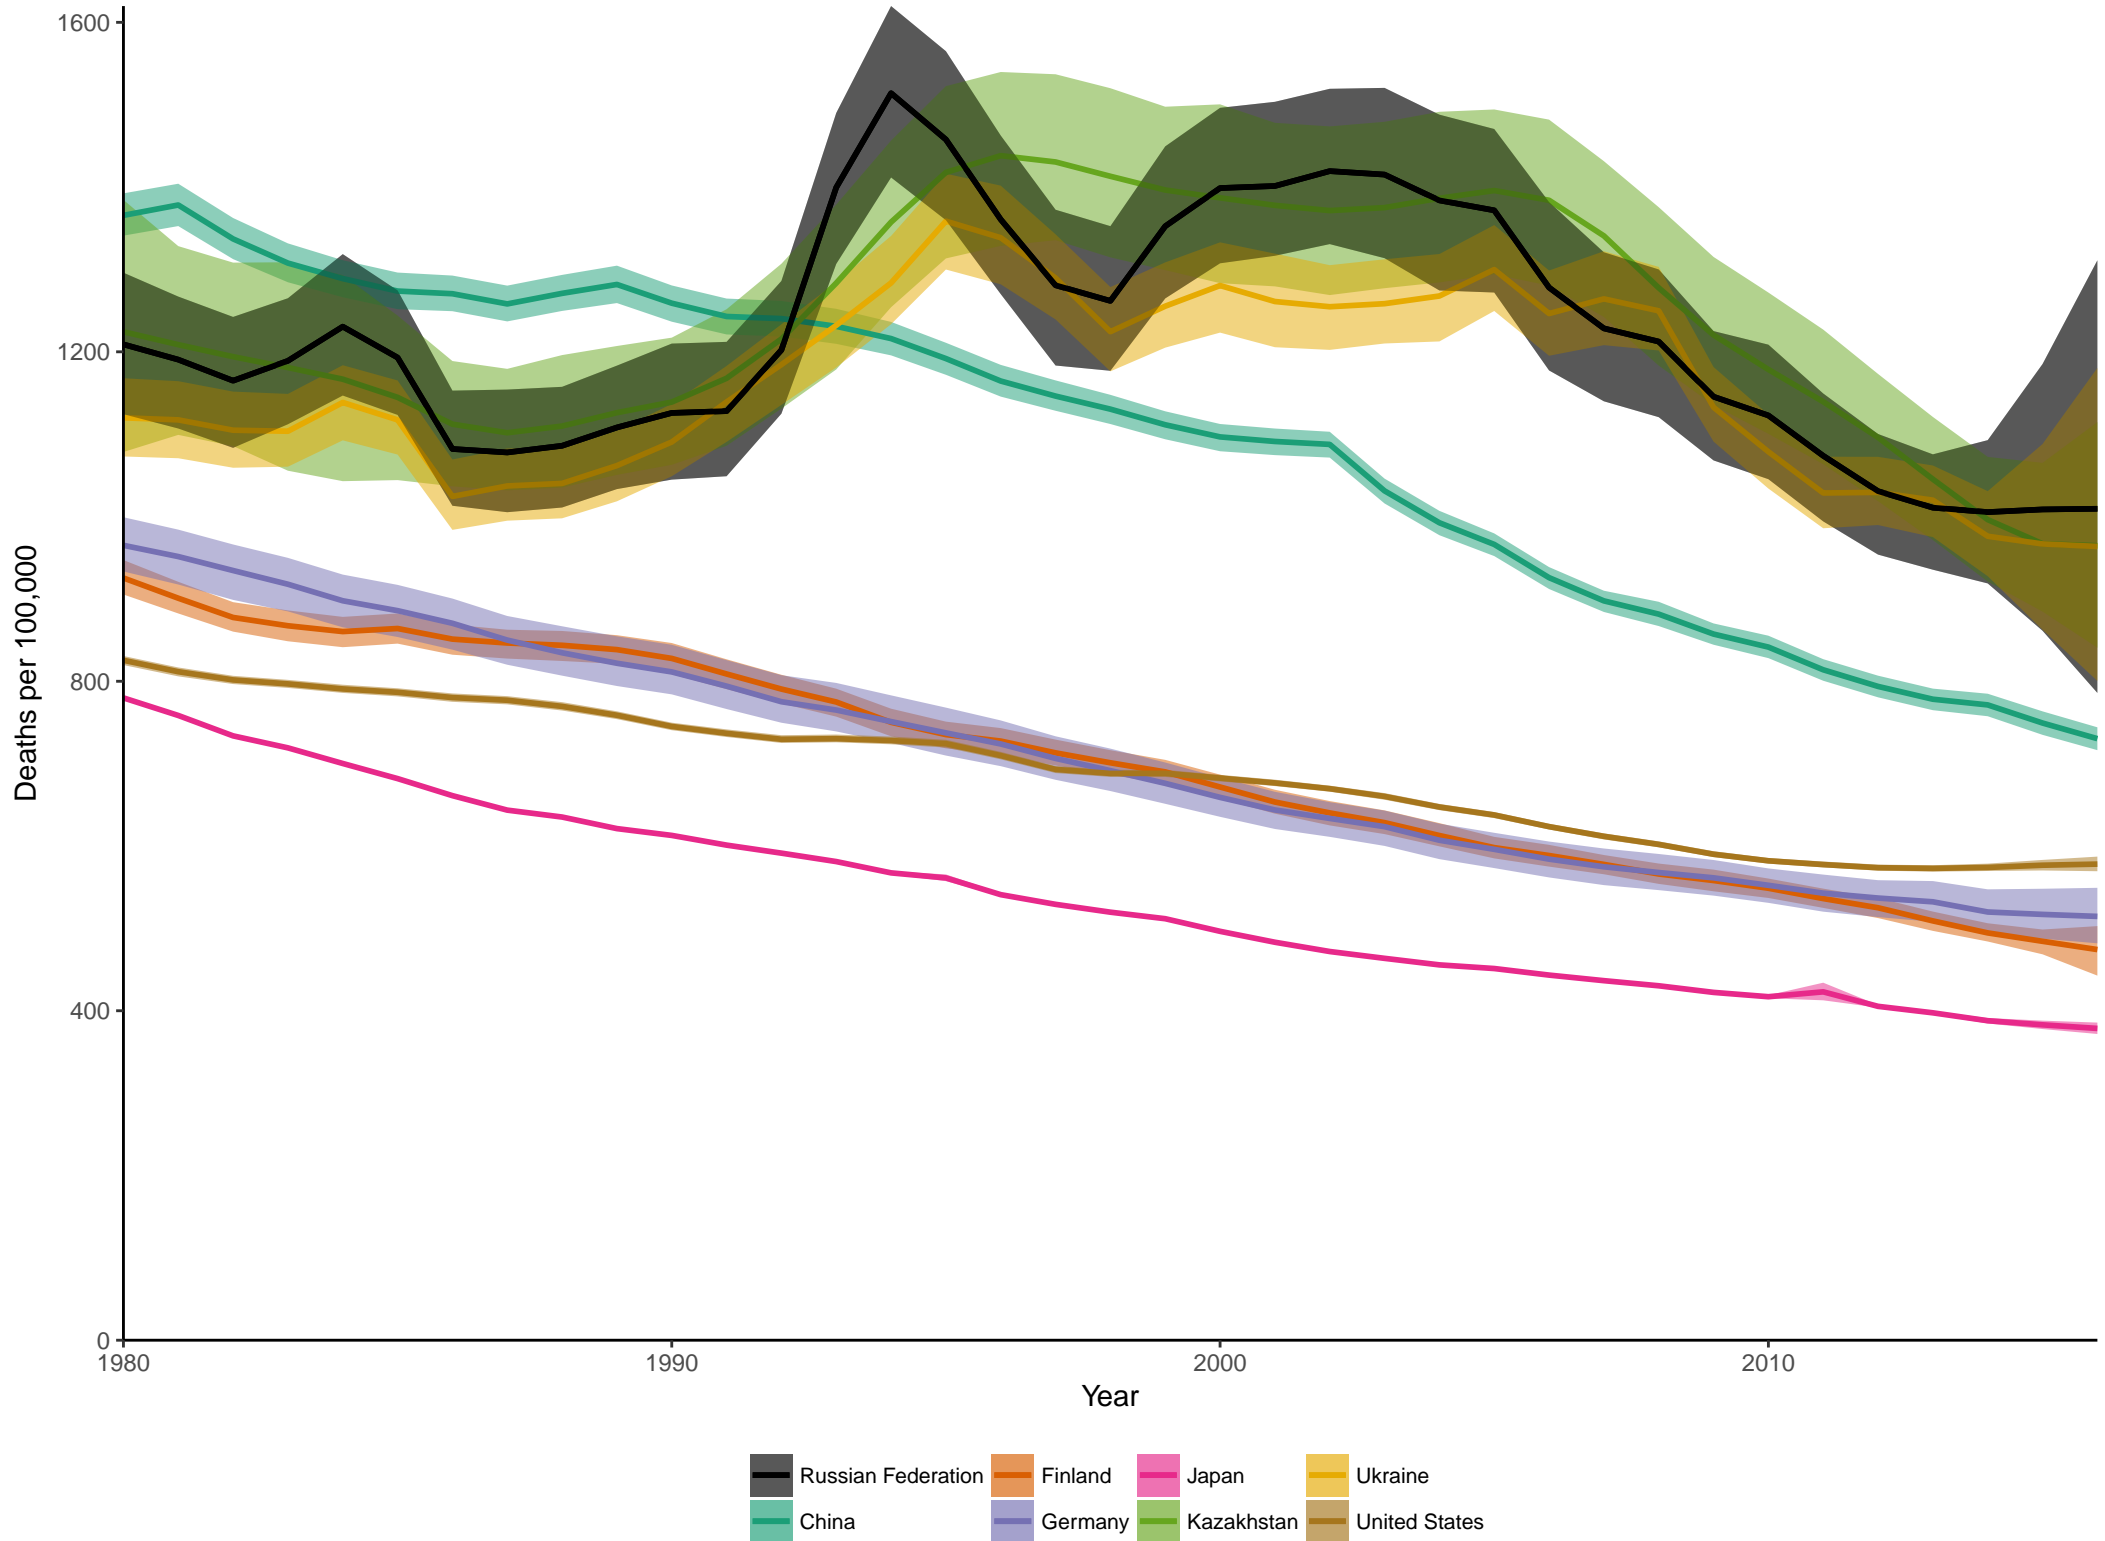

Trends in under-5 mortality for Russia and comparator countries, both sexes combined, 1980–2016

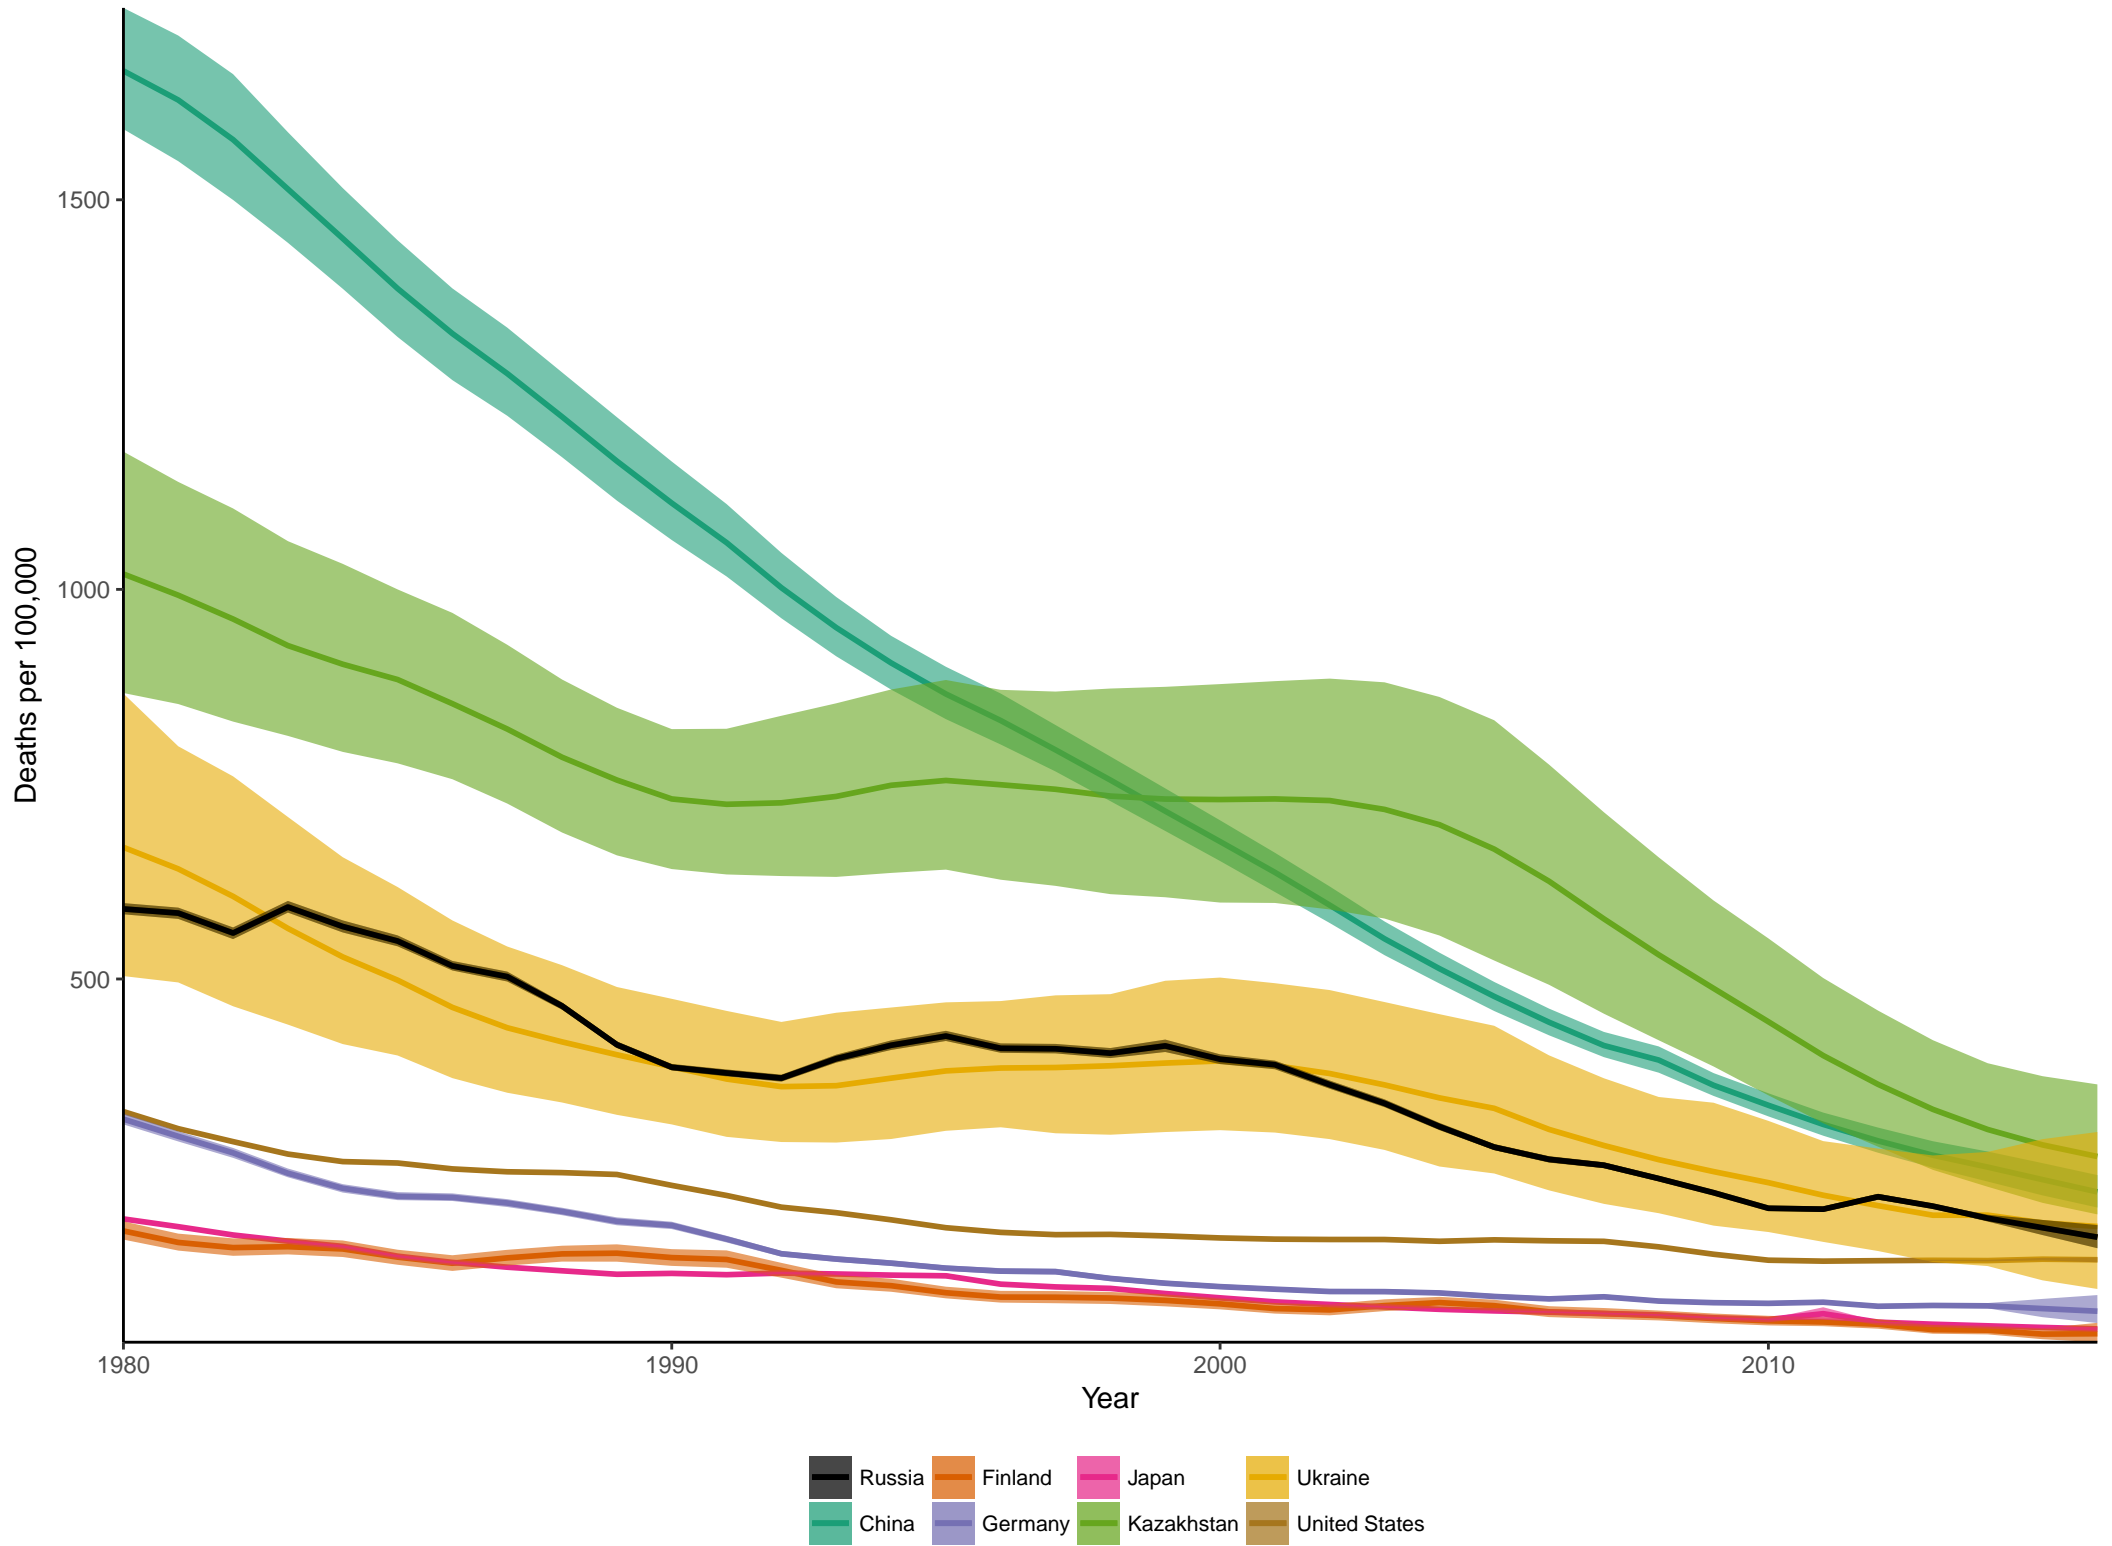

Top 20 level 3 causes of YLDs for 1990 and 2016, Russia Both sexes

| Leading causes 1990         | Leading causes 2016         | Mean % change number of YLDs 1990-2016 | Mean % change all-age YLD rate 1990-2016 | Mean % change age-standardized YLD rate 1990-2016 |
|-----------------------------|-----------------------------|----------------------------------------|------------------------------------------|---------------------------------------------------|
| 1 Low back & neck pain      | 1 Low back & neck pain      | 5.8% (1.1 to 10.3%)                    | 6.9% (2.2 to 11.5%)                      | -8.2% (-11.9 to -4.5%)                            |
| 2 Sense organ diseases      | 2 Sense organ diseases      | 20.0% (17.9 to 22.6%)                  | 21.3% (19.2 to 23.9%)                    | -2.4% (-3.9 to -0.8%)                             |
| 3 Migraine                  | 3 Falls                     | 10.8% (7.4 to 13.8%)                   | 12.1% (8.6 to 15.1%)                     | -3.9% (-6.8 to -1.3%)                             |
| 4 Falls                     | 4 Migraine                  | 3.8% (0.5 to 7.4%)                     | 4.9% (1.6 to 8.5%)                       | 0.2% (-2.8 to 3.3%)                               |
| 5 Depressive disorders      | 5 Depressive disorders      | 5.7% (0.6 to 11.3%)                    | 6.8% (1.7 to 12.5%)                      | -3.8% (-8.0 to 0.6%)                              |
| 6 Skin diseases             | 6 Skin diseases             | -4.9% (-7.1 to -2.8%)                  | -3.8% (-6.1 to -1.7%)                    | 1.9% (-0.1 to 4.2%)                               |
| 7 Stroke                    | 7 Stroke                    | 18.0% (8.0 to 27.3%)                   | 19.3% (9.2 to 28.7%)                     | -10.6% (-18.0 to -3.7%)                           |
| 8 Alcohol use disorders     | 8 Alcohol use disorders     | 4.3% (-4.5 to 13.8%)                   | 5.5% (-3.5 to 15.0%)                     | -0.7% (-9.1 to 8.2%)                              |
| 9 Drug use disorders        | 9 Oral disorders            | 18.3% (15.4 to 21.7%)                  | 19.6% (16.7 to 23.0%)                    | 0.2% (-1.6 to 2.2%)                               |
| 10 Oral disorders           | 10 Osteoarthritis           | 35.7% (31.0 to 40.5%)                  | 37.2% (32.4 to 42.0%)                    | 8.1% (4.4 to 11.8%)                               |
| 11 Diabetes                 | 11 Diabetes                 | 26.4% (13.7 to 39.6%)                  | 27.8% (15.0 to 41.1%)                    | 2.1% (-8.0 to 12.6%)                              |
| 12 Osteoarthritis           | 12 Drug use disorders       | -6.3% (-14.9 to 2.6%)                  | -5.3% (-14.0 to 3.7%)                    | -8.2% (-17.0 to 0.8%)                             |
| 13 Anxiety disorders        | 13 Anxiety disorders        | 1.6% (-4.7 to 8.3%)                    | 2.7% (-3.7 to 9.5%)                      | -0.2% (-6.4 to 6.2%)                              |
| 14 Road injuries            | 14 Road injuries            | 12.1% (8.8 to 15.5%)                   | 13.4% (9.9 to 16.7%)                     | -1.7% (-4.4 to 0.9%)                              |
| 15 Asthma                   | 15 Ischemic heart disease   | 29.7% (23.9 to 35.2%)                  | 31.1% (25.2 to 36.6%)                    | -0.6% (-4.8 to 3.5%)                              |
| 16 Gynecological diseases   | 16 Asthma                   | -9.7% (-14.6 to -4.9%)                 | -8.7% (-13.7 to -3.8%)                   | -9.4% (-14.4 to -4.8%)                            |
| 17 Congenital defects       | 17 Gynecological diseases   | 0.2% (-3.7 to 4.0%)                    | 1.3% (-2.6 to 5.1%)                      | -2.3% (-6.1 to 1.6%)                              |
| 18 Mechanical forces        | 18 Other mental & substance | 9.3% (4.2 to 14.2%)                    | 10.5% (5.4 to 15.5%)                     | 0.4% (-4.2 to 5.1%)                               |
| 19 Upper respiratory infect | 19 Upper respiratory infect | -6.6% (-10.9 to -2.4%)                 | -5.5% (-9.9 to -1.3%)                    | -0.1% (-3.9 to 3.9%)                              |
| 20 Ischemic heart disease   | 20 Mechanical forces        | -10.6% (-14.6 to -7.0%)                | -9.6% (-13.7 to -6.0%)                   | -19.4% (-22.8 to -16.3%)                          |
| 21 Other mental & substance | 22 Congenital defects       |                                        |                                          |                                                   |

Legend:

Communicable, maternal, neonatal and nutritional

Non-communicable

Injuries

**Percent of total deaths attributable to risks at level 3 of the GBD hierarchy  
Both All Ages, Russia 2016**

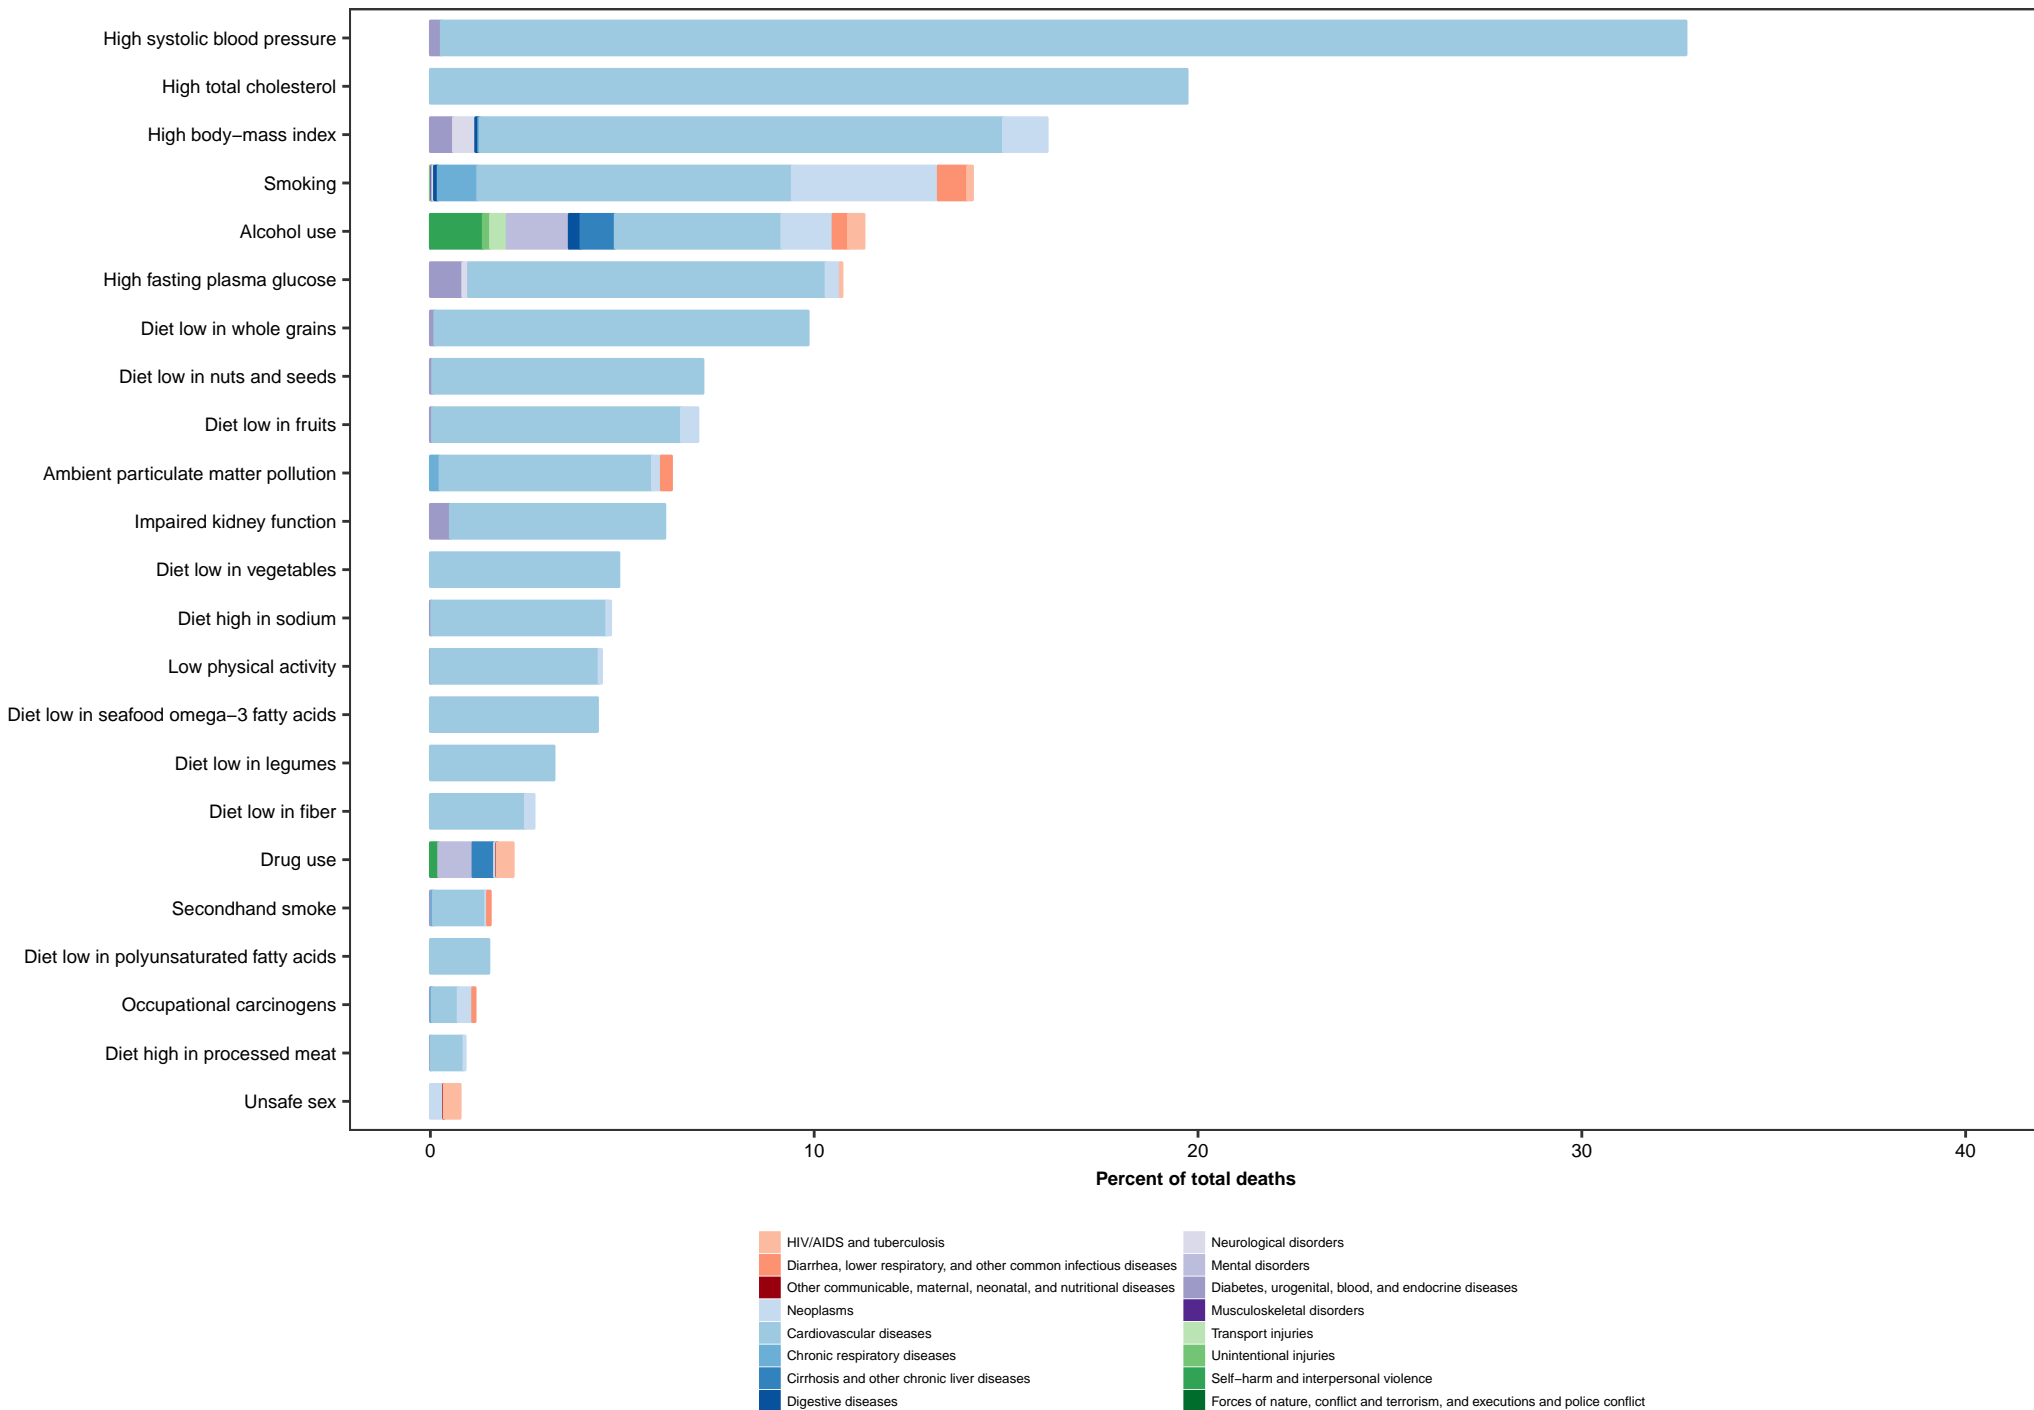

Risks attributable to less than 1% of total deaths omitted

**Percent of total deaths attributable to risks at level 3 of the GBD hierarchy  
Both 15–49 years, Russia 2016**

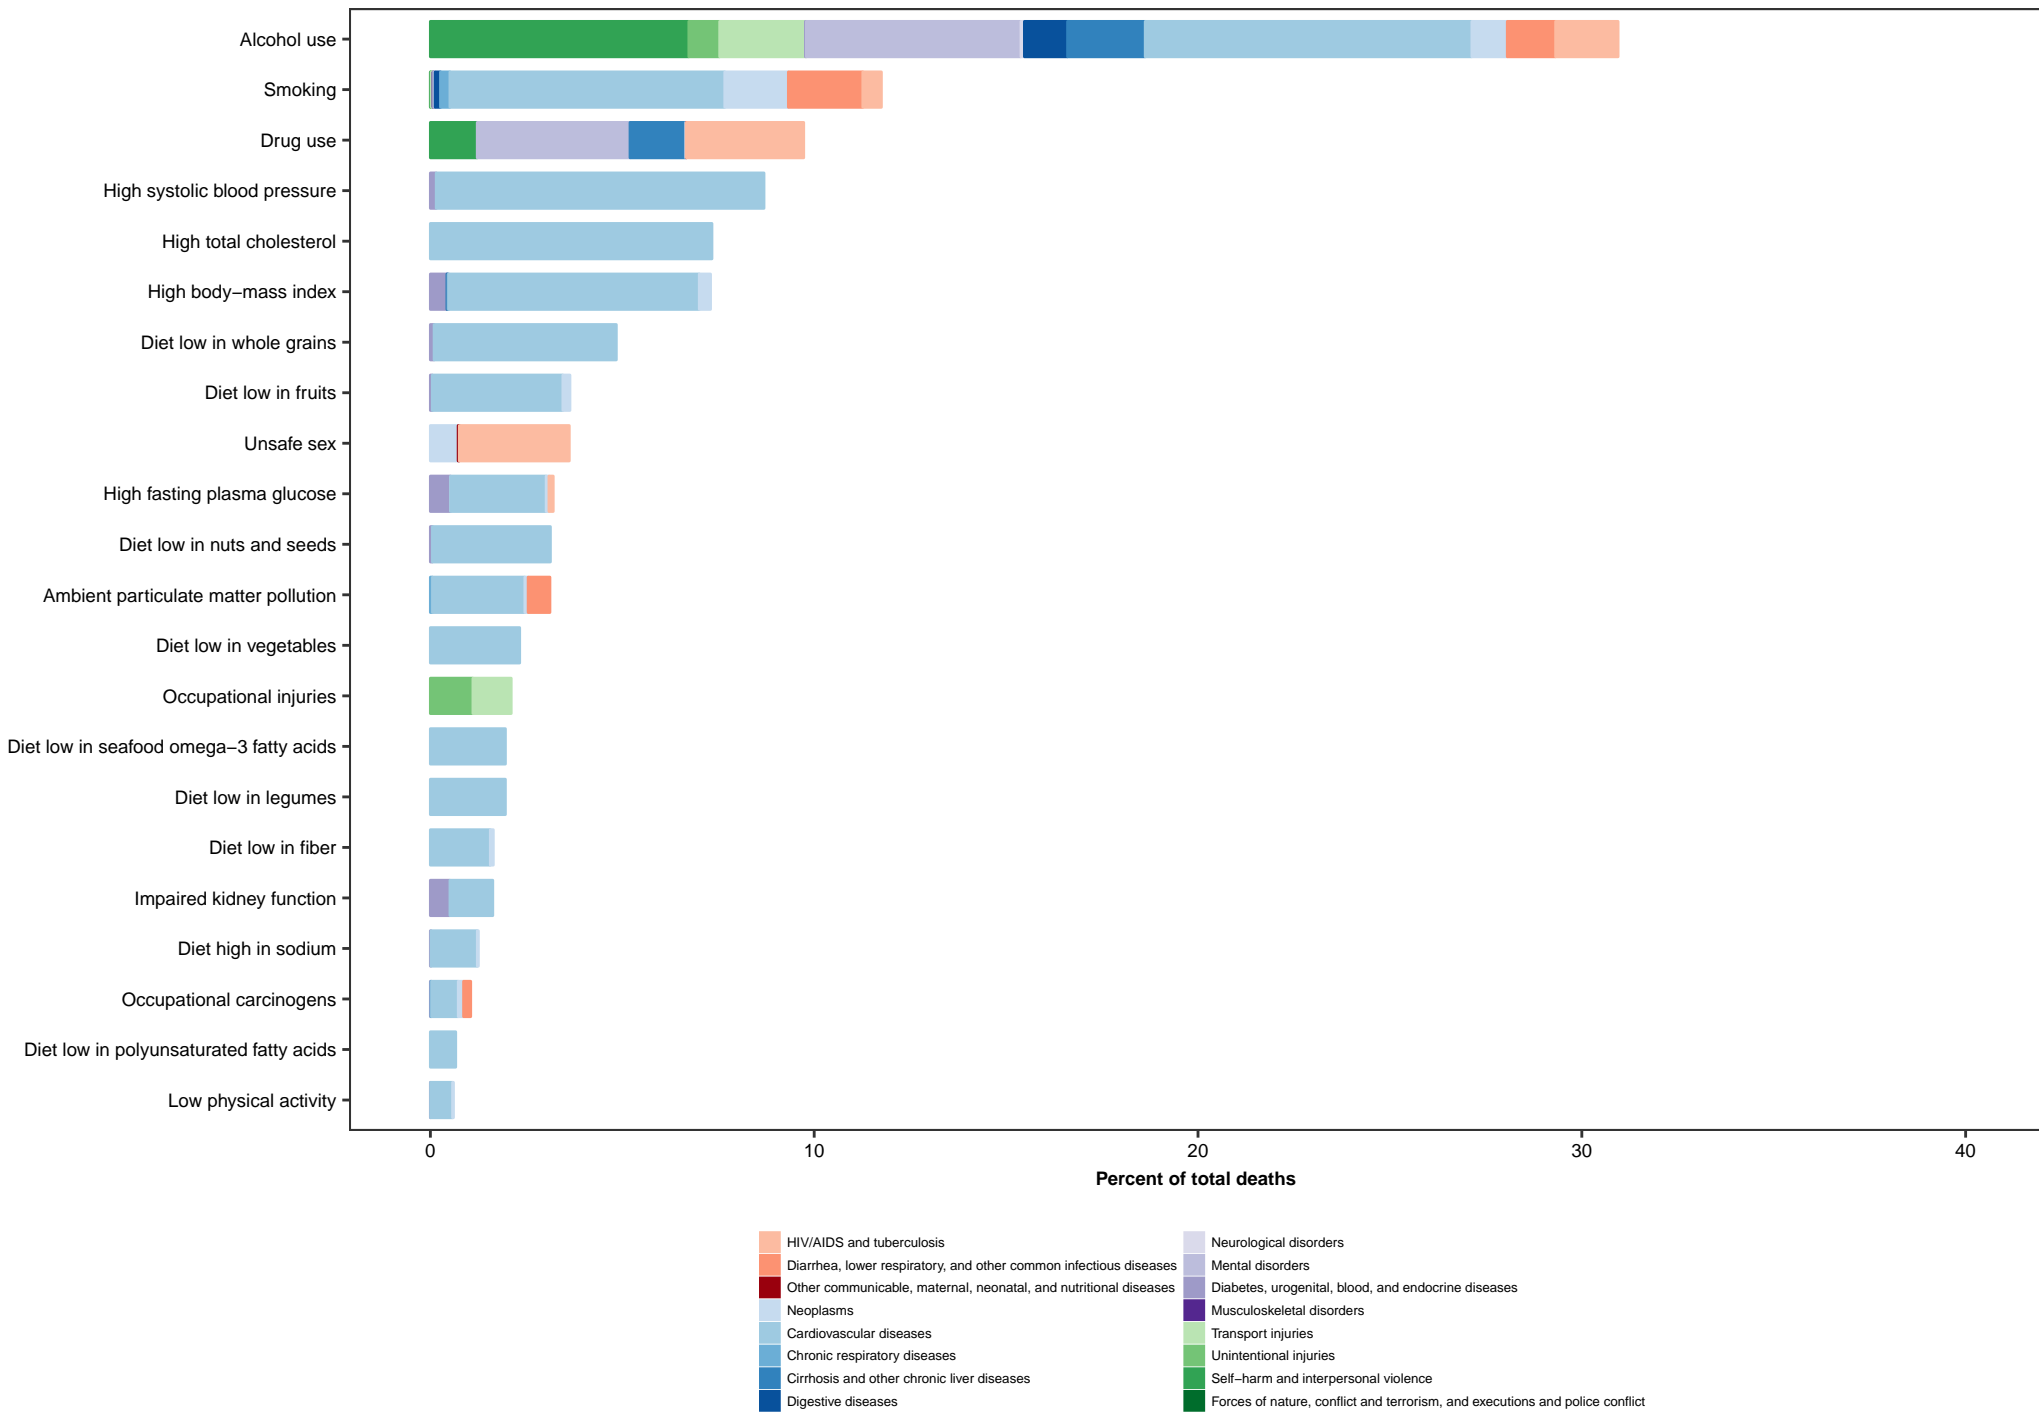

Risks attributable to less than 1% of total deaths omitted



Appendix Table 1. Number and age-standardised rate of deaths and DALYs, and the percent change from 1980 to 2016

|                                                                               | Deaths per 100,000          | Number of deaths                    | DALYS per 100,000                | Number of DALYs                        | percent change                |
|-------------------------------------------------------------------------------|-----------------------------|-------------------------------------|----------------------------------|----------------------------------------|-------------------------------|
| All causes                                                                    | 1,009.4<br>785.9 to 1,311.1 | 1,997,038<br>1,541,907 to 2,591,653 | 34,980.8<br>28,197.5 to 43,102.1 | 62,885,482<br>50,354,314 to 77,786,870 | -16.6<br>-33.8 to 9.4         |
| Communicable, maternal, neonatal, and nutritional diseases                    | 47.7<br>39.6 to 58.2        | 79,797<br>64,623 to 98,966          | 3,009.4<br>2,585.5 to 3,456.4    | 4,380,101<br>3,728,380 to 5,100,529    | -25.5<br>-37.9 to -8.8        |
| HIV/AIDS and tuberculosis                                                     | 18.3<br>15.7 to 21.3        | 30,875<br>26,440 to 36,294          | 905.4<br>797.0 to 1,036.0        | 1,478,772<br>1,289,707 to 1,702,175    | 80.7<br>48.2 to 116.9         |
| Tuberculosis                                                                  | 7.2<br>5.0 to 10.2          | 13,123<br>9,081 to 18,405           | 300.4<br>209.9 to 424.5          | 518,909<br>360,127 to 730,715          | -31.1<br>-51.5 to -5.7        |
| Drug-susceptible tuberculosis                                                 | 4.5<br>3.0 to 6.5           | 8,079<br>5,386 to 11,778            | 187.0<br>127.6 to 272.1          | 322,780<br>219,777 to 469,814          | -57.4<br>-70.2 to -38.3       |
| Multidrug-resistant tuberculosis without extensive drug resistance            | 1.8<br>1.1 to 2.6           | 3,196<br>1,950 to 4,759             | 72.1<br>44.1 to 108.0            | 124,767<br>75,528 to 186,505           | 5,010.3<br>2,103.4 to 9,933.1 |
| Extensively drug-resistant tuberculosis                                       | 1.0<br>0.6 to 1.5           | 1,848<br>1,131 to 2,743             | 41.2<br>25.0 to 62.2             | 71,362<br>43,033 to 106,795            | -<br>-                        |
| HIV/AIDS                                                                      | 11.0<br>10.1 to 12.1        | 17,752<br>16,233 to 19,578          | 605.0<br>548.3 to 672.5          | 959,863<br>869,606 to 1,072,136        | -<br>-                        |
| HIV/AIDS - Drug-susceptible Tuberculosis                                      | 0.4<br>0.2 to 0.7           | 653<br>352 to 1,137                 | 21.4<br>11.8 to 37.0             | 33,994<br>18,690 to 58,658             | -<br>-                        |
| HIV/AIDS - Multidrug-resistant Tuberculosis without extensive drug resistance | 0.2<br>0.1 to 0.3           | 329<br>174 to 559                   | 10.6<br>5.7 to 18.0              | 16,858<br>8,961 to 28,507              | -<br>-                        |
| HIV/AIDS - Extensively drug-resistant Tuberculosis                            | 0.1<br>0.1 to 0.2           | 190<br>99 to 324                    | 6.1<br>3.2 to 10.4               | 9,692<br>5,070 to 16,478               | -<br>-                        |
| HIV/AIDS resulting in other diseases                                          | 10.3<br>9.3 to 11.4         | 16,580<br>14,896 to 18,431          | 566.8<br>506.7 to 635.8          | 899,319<br>802,363 to 1,011,861        | -<br>-                        |
| Diarrhea, lower respiratory, and other common infectious diseases             | 22.6<br>17.0 to 29.6        | 41,162<br>30,298 to 54,589          | 1,163.9<br>917.3 to 1,442.1      | 1,800,962<br>1,379,857 to 2,280,520    | -29.2<br>-45.8 to -6.6        |
| Diarrheal diseases                                                            | 0.3<br>0.2 to 0.4           | 439<br>347 to 545                   | 91.2<br>66.7 to 119.7            | 111,524<br>81,554 to 145,633           | -89.7<br>-92.0 to -86.4       |
| Intestinal infectious diseases                                                | 0.0<br>0.0 to 0.0           | 9<br>3 to 21                        | 0.3<br>0.1 to 0.6                | 386<br>136 to 887                      | -67.8<br>-77.4 to -53.3       |
| Typhoid fever                                                                 | 0.0<br>0.0 to 0.0           | 5<br>1 to 11                        | 0.2<br>0.1 to 0.4                | 221<br>74 to 499                       | -81.7<br>-86.3 to -76.0       |
| Paratyphoid fever                                                             | 0.0<br>0.0 to 0.0           | 4<br>1 to 11                        | 0.1<br>0.0 to 0.3                | 157<br>44 to 397                       | 120.3<br>55.8 to 231.1        |
| Other intestinal infectious diseases                                          | 0.0<br>0.0 to 0.0           | 0<br>0 to 1                         | 0.0<br>0.0 to 0.0                | 8<br>3 to 16                           | -39.4<br>-66.4 to -4.3        |
| Lower respiratory infections                                                  | 20.4<br>15.1 to 26.9        | 37,613<br>27,719 to 50,026          | 742.5<br>557.3 to 974.6          | 1,238,472<br>903,679 to 1,641,732      | -15.9<br>-37.5 to 12.4        |
| Upper respiratory infections                                                  | 0.0<br>0.0 to 0.0           | 27<br>13 to 47                      | 172.9<br>104.9 to 268.8          | 233,662<br>141,869 to 359,796          | -20.9<br>-68.3 to 79.5        |
| Otitis media                                                                  | 0.0<br>0.0 to 0.0           | 3<br>2 to 5                         | 32.6<br>20.1 to 49.0             | 39,707<br>24,885 to 58,956             | -72.1<br>-84.2 to -53.6       |
| Meningitis                                                                    | 1.0<br>0.7 to 1.2           | 1,534<br>1,160 to 2,019             | 61.4<br>49.5 to 74.2             | 85,083<br>67,234 to 104,629            | -73.7<br>-80.4 to -65.4       |
| Pneumococcal meningitis                                                       | 0.1<br>0.0 to 0.1           | 117<br>85 to 159                    | 7.5<br>5.7 to 9.4                | 11,194<br>8,525 to 14,110              | -51.8<br>-63.3 to -37.4       |

|                                         |            |                |              |                   |                |
|-----------------------------------------|------------|----------------|--------------|-------------------|----------------|
|                                         | 0.1        | 114            | 6.1          | 8,231             | -67.8          |
| H influenzae type B meningitis          | 0.1 to 0.1 | 87 to 147      | 5.0 to 7.4   | 6,637 to 9,958    | -74.5 to -59.5 |
|                                         | 0.5        | 731            | 30.5         | 39,195            | -80.8          |
| Meningococcal meningitis                | 0.4 to 0.6 | 564 to 939     | 24.8 to 36.9 | 31,564 to 48,020  | -86.2 to -74.0 |
|                                         | 0.3        | 572            | 17.2         | 26,464            | -53.6          |
| Other meningitis                        | 0.2 to 0.4 | 407 to 770     | 13.2 to 21.6 | 19,923 to 34,008  | -64.6 to -38.8 |
|                                         | 0.9        | 1,485          | 56.5         | 83,072            | -3.4           |
| Encephalitis                            | 0.7 to 1.4 | 1,052 to 2,248 | 44.1 to 79.3 | 64,375 to 116,079 | -25.2 to 24.3  |
|                                         | 0.0        | 5              | 0.2          | 230               | -96.7          |
| Diphtheria                              | 0.0 to 0.0 | 3 to 8         | 0.1 to 0.3   | 144 to 360        | -98.4 to -93.6 |
|                                         | 0.0        | 9              | 1.9          | 1,938             | -33.9          |
| Whooping cough                          | 0.0 to 0.0 | 4 to 30        | 1.1 to 3.5   | 1,133 to 3,625    | -64.8 to 17.3  |
|                                         | 0.0        | 4              | 0.1          | 124               | -95.8          |
| Tetanus                                 | 0.0 to 0.0 | 3 to 7         | 0.1 to 0.1   | 85 to 190         | -96.9 to -94.0 |
|                                         | 0.0        | 3              | 0.3          | 268               | -92.5          |
| Measles                                 | 0.0 to 0.0 | 2 to 5         | 0.2 to 0.4   | 186 to 376        | -95.6 to -88.7 |
|                                         | 0.0        | 29             | 4.3          | 6,494             | -5.1           |
| Varicella and herpes zoster             | 0.0 to 0.0 | 12 to 46       | 2.5 to 6.0   | 4,058 to 9,332    | -32.2 to 23.2  |
|                                         | 0.1        | 115            | 21.6         | 37,273            | -4.7           |
| Neglected tropical diseases and malaria | 0.0 to 0.1 | 65 to 154      | 14.1 to 32.2 | 23,394 to 58,302  | -26.0 to 29.6  |
|                                         | 0.0        | 0              | 0.0          | 0                 | -              |
| Malaria                                 | 0.0 to 0.0 | 0 to 0         | 0.0 to 0.0   | 0 to 0            | -              |
|                                         | 0.0        | 0              | 0.0          | 0                 | -              |
| Chagas disease                          | 0.0 to 0.0 | 0 to 0         | 0.0 to 0.0   | 0 to 0            | -              |
|                                         | 0.0        | 0              | 0.0          | 0                 | -              |
| Leishmaniasis                           | 0.0 to 0.0 | 0 to 0         | 0.0 to 0.0   | 0 to 0            | -              |
|                                         | 0.0        | 0              | 0.0          | 0                 | -              |
| Visceral leishmaniasis                  | 0.0 to 0.0 | 0 to 0         | 0.0 to 0.0   | 0 to 0            | -              |
|                                         | 0.0        | 0              | 0.0          | 0                 | -              |
| African trypanosomiasis                 | 0.0 to 0.0 | 0 to 0         | 0.0 to 0.0   | 0 to 0            | -              |
|                                         | 0.0        | 0              | 0.0          | 0                 | -              |
| Schistosomiasis                         | 0.0 to 0.0 | 0 to 0         | 0.0 to 0.0   | 0 to 0            | -              |
|                                         | 0.0        | 4              | 0.9          | 1,685             | -65.9          |
| Cysticercosis                           | 0.0 to 0.0 | 3 to 5         | 0.1 to 2.4   | 114 to 4,410      | -74.8 to -53.1 |
|                                         | 0.0        | 35             | 1.5          | 2,568             | -65.0          |
| Cystic echinococcosis                   | 0.0 to 0.0 | 25 to 47       | 0.7 to 4.0   | 1,195 to 6,834    | -73.4 to -52.6 |
|                                         | 0.0        | 0              | 0.0          | 0                 | -              |
| Dengue                                  | 0.0 to 0.0 | 0 to 0         | 0.0 to 0.0   | 0 to 0            | -              |
|                                         | 0.0        | 0              | 0.0          | 0                 | -              |
| Yellow fever                            | 0.0 to 0.0 | 0 to 0         | 0.0 to 0.0   | 0 to 0            | -              |
|                                         | 0.0        | 3              | 0.1          | 123               | 7.6            |
| Rabies                                  | 0.0 to 0.0 | 2 to 4         | 0.1 to 0.1   | 86 to 173         | -37.9 to 66.7  |
|                                         | 0.0        | 0              | 0.0          | 0                 | -              |
| Intestinal nematode infections          | 0.0 to 0.0 | 0 to 0         | 0.0 to 0.0   | 0 to 0            | -              |
|                                         | 0.0        | 0              | 0.0          | 0                 | -              |
| Ascariasis                              | 0.0 to 0.0 | 0 to 0         | 0.0 to 0.0   | 0 to 0            | -              |
|                                         | 0.0        | 0              | 0.0          | 0                 | -              |
| Ebola                                   | 0.0 to 0.0 | 0 to 0         | 0.0 to 0.0   | 0 to 0            | -              |

|                                                                  |                   |                         |                         |                               |                         |
|------------------------------------------------------------------|-------------------|-------------------------|-------------------------|-------------------------------|-------------------------|
| Zika virus                                                       | 0.0<br>0.0 to 0.0 | 0<br>0 to 0             | 0.0<br>0.0 to 0.0       | 0<br>0 to 0                   | -                       |
| Other neglected tropical diseases                                | 0.0<br>0.0 to 0.1 | 74<br>26 to 103         | 2.7<br>1.0 to 3.7       | 3,556<br>1,206 to 4,962       | 163.4<br>88.9 to 256.3  |
| Maternal disorders                                               | 0.2<br>0.1 to 0.4 | 337<br>178 to 588       | 19.7<br>13.2 to 29.6    | 29,241<br>19,601 to 44,381    | -80.7<br>-89.8 to -64.5 |
| Maternal hemorrhage                                              | 0.0<br>0.0 to 0.1 | 63<br>31 to 113         | 4.4<br>2.9 to 6.5       | 6,698<br>4,347 to 9,969       | -77.0<br>-87.8 to -53.3 |
| Maternal sepsis and other maternal infections                    | 0.0<br>0.0 to 0.0 | 24<br>12 to 43          | 1.9<br>1.2 to 3.0       | 2,762<br>1,687 to 4,332       | -70.2<br>-83.4 to -42.9 |
| Maternal hypertensive disorders                                  | 0.0<br>0.0 to 0.0 | 40<br>20 to 71          | 3.3<br>2.2 to 5.1       | 4,860<br>3,127 to 7,339       | -80.3<br>-90.0 to -64.9 |
| Maternal obstructed labor and uterine rupture                    | 0.0<br>0.0 to 0.0 | 5<br>2 to 10            | 0.5<br>0.3 to 0.9       | 804<br>420 to 1,352           | 8.9<br>-47.0 to 126.7   |
| Maternal abortion, miscarriage, and ectopic pregnancy            | 0.0<br>0.0 to 0.1 | 63<br>33 to 113         | 3.2<br>1.9 to 5.0       | 4,725<br>2,870 to 7,604       | -89.6<br>-94.5 to -80.5 |
| Indirect maternal deaths                                         | 0.0<br>0.0 to 0.1 | 70<br>36 to 127         | 2.7<br>1.4 to 4.8       | 3,965<br>2,061 to 7,221       | -84.3<br>-92.5 to -70.8 |
| Late maternal deaths                                             | 0.0<br>0.0 to 0.0 | 3<br>1 to 5             | 0.1<br>0.1 to 0.2       | 149<br>72 to 286              | -88.6<br>-94.2 to -78.7 |
| Maternal deaths aggravated by HIV/AIDS                           | 0.0<br>0.0 to 0.0 | 1<br>0 to 1             | 0.0<br>0.0 to 0.0       | 34<br>12 to 76                | -                       |
| Other maternal disorders                                         | 0.0<br>0.0 to 0.1 | 68<br>35 to 121         | 3.5<br>2.2 to 5.4       | 5,243<br>3,290 to 8,133       | -29.0<br>-61.4 to 33.8  |
| Neonatal disorders                                               | 5.5<br>4.7 to 6.2 | 5,599<br>4,792 to 6,318 | 681.9<br>582.2 to 790.3 | 750,777<br>636,852 to 884,474 | -70.6<br>-74.6 to -65.2 |
| Neonatal preterm birth complications                             | 2.0<br>1.6 to 2.4 | 2,060<br>1,654 to 2,461 | 238.9<br>197.6 to 281.1 | 260,574<br>215,017 to 308,983 | -75.4<br>-80.3 to -68.8 |
| Neonatal encephalopathy due to birth asphyxia and trauma         | 1.4<br>1.1 to 1.7 | 1,452<br>1,137 to 1,765 | 203.8<br>155.8 to 260.7 | 231,521<br>172,861 to 305,751 | -78.4<br>-82.8 to -72.5 |
| Neonatal sepsis and other neonatal infections                    | 0.9<br>0.6 to 1.4 | 890<br>653 to 1,414     | 120.9<br>83.8 to 184.7  | 135,380<br>91,195 to 217,576  | -3.2<br>-34.0 to 30.7   |
| Hemolytic disease and other neonatal jaundice                    | 0.1<br>0.0 to 0.1 | 63<br>42 to 95          | 14.8<br>11.3 to 19.2    | 18,248<br>14,013 to 23,648    | -84.8<br>-91.8 to -74.4 |
| Other neonatal disorders                                         | 1.1<br>0.9 to 1.4 | 1,134<br>886 to 1,408   | 103.5<br>81.6 to 126.8  | 105,053<br>82,779 to 128,522  | -55.3<br>-69.7 to -39.5 |
| Nutritional deficiencies                                         | 0.4<br>0.3 to 0.5 | 751<br>564 to 991       | 130.3<br>84.4 to 193.2  | 166,755<br>111,166 to 248,655 | -48.7<br>-60.0 to -27.8 |
| Protein-energy malnutrition                                      | 0.1<br>0.1 to 0.2 | 213<br>122 to 372       | 19.4<br>12.7 to 28.1    | 22,612<br>15,341 to 32,197    | -68.2<br>-75.9 to -53.5 |
| Iodine deficiency                                                | 0.0<br>0.0 to 0.0 | 27<br>2 to 77           | 15.7<br>9.6 to 23.3     | 26,257<br>16,315 to 38,334    | -54.3<br>-97.1 to 44.8  |
| Iron-deficiency anemia                                           | 0.0<br>0.0 to 0.0 | 32<br>19 to 75          | 88.1<br>51.6 to 140.6   | 105,926<br>62,808 to 171,859  | -89.0<br>-92.0 to -83.9 |
| Other nutritional deficiencies                                   | 0.2<br>0.2 to 0.3 | 479<br>314 to 652       | 7.0<br>4.7 to 9.5       | 11,960<br>7,811 to 16,187     | 9.6<br>-20.9 to 61.7    |
| Other communicable, maternal, neonatal, and nutritional diseases | 0.7<br>0.5 to 0.9 | 959<br>720 to 1,212     | 85.9<br>63.2 to 115.4   | 115,275<br>85,937 to 157,258  | -29.1<br>-45.1 to -9.1  |

|                                             |                  |                        |                      |                          |                |
|---------------------------------------------|------------------|------------------------|----------------------|--------------------------|----------------|
|                                             | 0.1              | 210                    | 40.9                 | 61,939                   | -58.5          |
| Sexually transmitted diseases excluding HIV | 0.1 to 0.2       | 130 to 323             | 26.9 to 62.4         | 41,079 to 93,684         | -77.4 to -33.7 |
|                                             | 0.1              | 89                     | 9.2                  | 13,863                   | -71.7          |
| Syphilis                                    | 0.0 to 0.1       | 52 to 145              | 5.8 to 13.9          | 9,701 to 19,124          | -86.4 to -54.0 |
|                                             | 0.0              | 23                     | 6.4                  | 9,891                    | -9.4           |
| Chlamydial infection                        | 0.0 to 0.0       | 12 to 38               | 3.8 to 10.6          | 6,010 to 16,250          | -43.7 to 52.1  |
|                                             | 0.0              | 66                     | 8.8                  | 12,040                   | -25.0          |
| Gonococcal infection                        | 0.0 to 0.1       | 36 to 109              | 5.2 to 14.3          | 7,320 to 19,306          | -53.3 to 23.0  |
|                                             | 0.0              | 32                     | 11.5                 | 17,413                   | -24.6          |
| Other sexually transmitted diseases         | 0.0 to 0.0       | 17 to 53               | 7.4 to 17.9          | 11,336 to 26,647         | -53.5 to 25.4  |
|                                             | 0.1              | 246                    | 7.5                  | 10,852                   | -69.4          |
| Acute hepatitis                             | 0.1 to 0.2       | 182 to 329             | 5.8 to 9.5           | 8,280 to 14,198          | -76.4 to -56.5 |
|                                             | 0.0              | 20                     | 1.7                  | 1,830                    | -85.9          |
| Acute hepatitis A                           | 0.0 to 0.0       | 15 to 27               | 1.2 to 2.2           | 1,364 to 2,377           | -90.7 to -79.2 |
|                                             | 0.1              | 201                    | 5.0                  | 7,975                    | -60.8          |
| Acute hepatitis B                           | 0.1 to 0.2       | 142 to 274             | 3.6 to 6.7           | 5,712 to 10,836          | -71.2 to -43.1 |
|                                             | 0.0              | 8                      | 0.2                  | 316                      | -57.5          |
| Acute hepatitis C                           | 0.0 to 0.0       | 5 to 12                | 0.1 to 0.3           | 216 to 443               | -68.7 to -38.5 |
|                                             | 0.0              | 17                     | 0.6                  | 730                      | -78.9          |
| Acute hepatitis E                           | 0.0 to 0.0       | 12 to 24               | 0.4 to 0.8           | 531 to 987               | -84.7 to -70.9 |
|                                             | 0.4              | 502                    | 37.5                 | 42,484                   | 115.9          |
| Other unspecified infectious diseases       | 0.3 to 0.5       | 333 to 638             | 23.5 to 48.9         | 27,857 to 55,007         | 68.1 to 171.7  |
|                                             | 858.7            | 1,742,519              | 26,020.5             | 48,938,521               | -14.5          |
| Non-communicable diseases                   | 663.0 to 1,107.3 | 1,339,352 to 2,250,680 | 20,835.1 to 31,997.4 | 39,218,978 to 60,458,684 | -32.5 to 13.2  |
|                                             | 147.5            | 305,543                | 3,585.1              | 7,151,792                | -16.8          |
| Neoplasms                                   | 111.6 to 195.4   | 231,764 to 403,970     | 2,703.2 to 4,798.4   | 5,383,879 to 9,555,005   | -35.1 to 11.0  |
|                                             | 2.9              | 6,005                  | 76.6                 | 155,928                  | 9.1            |
| Lip and oral cavity cancer                  | 2.1 to 3.9       | 4,270 to 8,046         | 53.8 to 104.0        | 109,164 to 209,940       | -16.8 to 44.7  |
|                                             | 0.3              | 643                    | 9.7                  | 18,501                   | 28.8           |
| Nasopharynx cancer                          | 0.2 to 0.4       | 461 to 863             | 6.9 to 13.1          | 13,086 to 24,956         | -6.2 to 70.5   |
|                                             | 1.8              | 3,691                  | 49.3                 | 101,830                  | 31.2           |
| Other pharynx cancer                        | 1.2 to 2.4       | 2,542 to 5,049         | 33.8 to 67.9         | 69,675 to 139,804        | -6.0 to 77.1   |
|                                             | 3.7              | 7,916                  | 88.5                 | 185,337                  | -32.1          |
| Esophageal cancer                           | 2.7 to 4.9       | 5,673 to 10,463        | 61.9 to 119.3        | 129,088 to 249,422       | -50.0 to -9.2  |
|                                             | 17.0             | 35,534                 | 376.5                | 770,711                  | -60.4          |
| Stomach cancer                              | 12.8 to 22.3     | 26,847 to 46,381       | 278.8 to 505.6       | 575,054 to 1,030,220     | -69.5 to -47.5 |
|                                             | 19.6             | 41,391                 | 402.7                | 833,634                  | 17.5           |
| Colon and rectum cancer                     | 14.8 to 25.7     | 30,944 to 54,140       | 297.7 to 531.8       | 617,041 to 1,101,547     | -7.8 to 63.6   |
|                                             | 5.1              | 10,640                 | 116.4                | 236,911                  | 15.5           |
| Liver cancer                                | 3.8 to 6.7       | 7,995 to 13,985        | 85.2 to 155.5        | 175,402 to 315,908       | -10.3 to 52.9  |
|                                             | 1.8              | 3,836                  | 45.0                 | 90,554                   | 5.4            |
| Liver cancer due to hepatitis B             | 1.3 to 2.5       | 2,692 to 5,234         | 30.9 to 62.2         | 62,380 to 125,732        | -18.7 to 39.6  |
|                                             | 0.6              | 1,316                  | 12.2                 | 25,625                   | 14.6           |
| Liver cancer due to hepatitis C             | 0.5 to 0.8       | 995 to 1,767           | 9.0 to 16.3          | 18,837 to 34,586         | -12.8 to 55.0  |
|                                             | 1.8              | 3,695                  | 38.7                 | 79,858                   | 45.3           |
| Liver cancer due to alcohol use             | 1.3 to 2.4       | 2,705 to 4,972         | 28.0 to 52.9         | 57,708 to 108,556        | 10.5 to 99.0   |
|                                             | 0.9              | 1,793                  | 20.5                 | 40,874                   | -4.5           |
| Liver cancer due to other causes            | 0.6 to 1.1       | 1,307 to 2,362         | 14.8 to 27.3         | 29,275 to 54,909         | -25.8 to 28.2  |

|                                                    |                      |                            |                         |                                   |                         |
|----------------------------------------------------|----------------------|----------------------------|-------------------------|-----------------------------------|-------------------------|
| Gallbladder and biliary tract cancer               | 1.7<br>1.2 to 2.3    | 3,546<br>2,609 to 4,812    | 33.3<br>24.4 to 45.6    | 69,222<br>50,881 to 94,895        | -54.9<br>-66.1 to -35.2 |
| Pancreatic cancer                                  | 8.4<br>6.3 to 11.3   | 17,645<br>13,259 to 23,575 | 187.8<br>139.4 to 253.5 | 385,950<br>287,502 to 520,887     | 30.2<br>-1.7 to 71.5    |
| Larynx cancer                                      | 2.4<br>1.6 to 3.3    | 4,959<br>3,439 to 6,825    | 61.1<br>41.7 to 84.9    | 127,361<br>87,068 to 177,078      | -28.6<br>-50.8 to -0.8  |
| Tracheal, bronchus, and lung cancer                | 24.7<br>17.7 to 32.2 | 52,152<br>37,268 to 67,758 | 581.2<br>409.2 to 780.5 | 1,216,078<br>856,245 to 1,631,400 | -28.4<br>-47.2 to -4.9  |
| Malignant skin melanoma                            | 2.2<br>1.5 to 3.0    | 4,390<br>3,004 to 6,044    | 61.0<br>42.0 to 83.9    | 116,733<br>80,735 to 159,565      | 30.4<br>-1.8 to 90.9    |
| Non-melanoma skin cancer                           | 1.1<br>0.8 to 1.4    | 2,225<br>1,717 to 2,868    | 20.1<br>15.1 to 26.9    | 40,737<br>30,526 to 54,297        | 20.8<br>-3.8 to 54.5    |
| Non-melanoma skin cancer (squamous-cell carcinoma) | 1.1<br>0.8 to 1.4    | 2,225<br>1,717 to 2,868    | 20.1<br>15.0 to 26.9    | 40,709<br>30,518 to 54,262        | 20.8<br>-3.8 to 54.5    |
| Breast cancer                                      | 11.6<br>7.3 to 17.8  | 23,791<br>15,140 to 36,677 | 297.8<br>190.5 to 465.4 | 595,322<br>381,822 to 926,220     | 18.3<br>-24.2 to 89.1   |
| Cervical cancer                                    | 3.5<br>2.1 to 5.6    | 6,916<br>4,210 to 10,891   | 111.7<br>66.4 to 182.2  | 207,109<br>123,606 to 333,103     | -46.9<br>-66.7 to -14.9 |
| Uterine cancer                                     | 3.2<br>2.0 to 4.9    | 6,658<br>4,197 to 10,170   | 77.5<br>49.3 to 115.4   | 159,062<br>102,073 to 238,066     | 68.4<br>0.7 to 171.5    |
| Ovarian cancer                                     | 4.3<br>2.6 to 6.6    | 8,822<br>5,319 to 13,615   | 112.6<br>68.0 to 175.0  | 223,712<br>135,432 to 345,816     | -16.4<br>-50.6 to 34.8  |
| Prostate cancer                                    | 5.6<br>3.8 to 7.5    | 11,836<br>8,062 to 16,085  | 104.1<br>71.5 to 140.8  | 220,902<br>151,847 to 298,986     | 157.7<br>89.1 to 246.9  |
| Testicular cancer                                  | 0.2<br>0.1 to 0.3    | 340<br>217 to 480          | 8.9<br>5.6 to 12.9      | 14,530<br>9,088 to 20,985         | -35.9<br>-58.2 to -2.7  |
| Kidney cancer                                      | 4.6<br>3.4 to 6.0    | 9,617<br>7,125 to 12,565   | 112.8<br>83.3 to 148.5  | 228,686<br>168,656 to 301,242     | 75.4<br>38.3 to 134.6   |
| Bladder cancer                                     | 3.6<br>2.7 to 4.6    | 7,563<br>5,714 to 9,829    | 69.3<br>51.8 to 91.6    | 145,353<br>108,729 to 192,113     | -7.1<br>-28.8 to 19.2   |
| Brain and nervous system cancer                    | 4.0<br>2.9 to 5.4    | 7,469<br>5,421 to 10,134   | 144.3<br>108.2 to 192.0 | 243,185<br>179,921 to 325,252     | -7.8<br>-31.5 to 27.0   |
| Thyroid cancer                                     | 0.6<br>0.4 to 0.8    | 1,263<br>900 to 1,733      | 14.5<br>10.8 to 19.4    | 29,243<br>21,677 to 39,338        | -11.6<br>-34.2 to 26.7  |
| Mesothelioma                                       | 0.3<br>0.2 to 0.4    | 691<br>507 to 922          | 8.6<br>6.1 to 11.6      | 16,950<br>12,191 to 22,916        | -9.7<br>-32.1 to 28.6   |
| Hodgkin lymphoma                                   | 0.6<br>0.4 to 0.8    | 1,066<br>767 to 1,466      | 24.5<br>17.8 to 33.6    | 40,357<br>29,094 to 55,308        | -52.2<br>-64.4 to -32.7 |
| Non-Hodgkin lymphoma                               | 2.4<br>1.8 to 3.3    | 4,752<br>3,480 to 6,410    | 71.9<br>52.5 to 95.5    | 129,565<br>94,728 to 172,747      | 1.2<br>-22.8 to 33.3    |
| Multiple myeloma                                   | 1.3<br>0.9 to 1.8    | 2,662<br>1,916 to 3,652    | 31.0<br>22.1 to 42.7    | 63,391<br>45,414 to 86,642        | 17.6<br>-16.0 to 70.1   |
| Leukemia                                           | 4.4<br>3.3 to 5.7    | 8,324<br>6,250 to 10,936   | 139.9<br>108.6 to 182.5 | 233,844<br>178,222 to 305,292     | -19.9<br>-38.1 to 4.7   |
| Acute lymphoid leukemia                            | 0.8<br>0.6 to 1.1    | 1,350<br>1,009 to 1,770    | 38.9<br>30.9 to 48.8    | 52,487<br>40,655 to 67,725        | -36.5<br>-49.8 to -15.1 |
| Chronic lymphoid leukemia                          | 0.9<br>0.7 to 1.2    | 1,959<br>1,446 to 2,619    | 19.9<br>14.7 to 26.7    | 41,555<br>30,610 to 55,777        | 24.6<br>-6.3 to 62.1    |

|                                               |                |                      |                     |                          |                |
|-----------------------------------------------|----------------|----------------------|---------------------|--------------------------|----------------|
|                                               | 1.3            | 2,480                | 45.3                | 75,630                   | 5.8            |
| Acute myeloid leukemia                        | 1.0 to 1.8     | 1,820 to 3,350       | 33.1 to 60.5        | 55,067 to 101,405        | -20.3 to 40.4  |
|                                               | 0.3            | 691                  | 9.1                 | 17,331                   | -41.9          |
| Chronic myeloid leukemia                      | 0.2 to 0.5     | 501 to 937           | 6.5 to 12.5         | 12,412 to 23,869         | -59.5 to -21.2 |
|                                               | 0.9            | 1,843                | 26.7                | 46,841                   | -38.8          |
| Other leukemia                                | 0.7 to 1.2     | 1,359 to 2,429       | 20.2 to 34.9        | 34,797 to 61,845         | -53.4 to -15.4 |
|                                               | 6.6            | 13,036               | 191.5               | 341,646                  | 7.4            |
| Other neoplasms                               | 4.9 to 8.9     | 9,758 to 17,584      | 142.8 to 254.6      | 252,011 to 459,118       | -16.6 to 46.9  |
|                                               | 562.8          | 1,150,431            | 9,998.2             | 20,348,866               | -13.6          |
| Cardiovascular diseases                       | 438.3 to 721.3 | 892,130 to 1,479,670 | 7,675.5 to 12,985.0 | 15,677,148 to 26,401,671 | -31.4 to 14.8  |
|                                               | 2.1            | 4,301                | 55.7                | 109,043                  | -72.8          |
| Rheumatic heart disease                       | 1.5 to 2.9     | 3,076 to 5,889       | 39.8 to 76.1        | 77,819 to 149,391        | -80.0 to -62.4 |
|                                               | 327.1          | 670,801              | 5,240.0             | 10,823,042               | -13.7          |
| Ischemic heart disease                        | 255.1 to 416.6 | 521,602 to 857,942   | 3,985.9 to 6,825.7  | 8,238,153 to 14,113,901  | -30.7 to 13.2  |
|                                               | 168.0          | 345,861              | 2,939.5             | 6,082,727                | -25.1          |
| Stroke                                        | 131.5 to 215.3 | 267,315 to 444,861   | 2,300.8 to 3,732.5  | 4,773,920 to 7,736,480   | -41.5 to 0.7   |
|                                               | 124.9          | 258,005              | 2,009.7             | 4,228,949                | -26.8          |
| Ischemic stroke                               | 97.0 to 159.3  | 199,821 to 330,603   | 1,588.8 to 2,514.7  | 3,338,120 to 5,297,810   | -42.5 to -1.5  |
|                                               | 43.1           | 87,856               | 929.8               | 1,853,779                | -19.7          |
| Intracerebral hemorrhage                      | 32.4 to 56.5   | 66,274 to 115,435    | 695.8 to 1,233.7    | 1,393,393 to 2,447,712   | -39.8 to 10.0  |
|                                               | 11.1           | 22,894               | 197.5               | 408,998                  | 100.9          |
| Hypertensive heart disease                    | 7.5 to 18.6    | 15,465 to 38,505     | 137.7 to 317.0      | 284,009 to 656,535       | 51.7 to 181.6  |
|                                               | 34.0           | 64,720               | 1,100.3             | 1,998,050                | 46.1           |
| Cardiomyopathy and myocarditis                | 23.0 to 46.1   | 44,327 to 88,101     | 762.2 to 1,520.1    | 1,397,323 to 2,743,864   | 9.9 to 99.1    |
|                                               | 0.6            | 1,138                | 16.7                | 26,848                   | 7.8            |
| Myocarditis                                   | 0.3 to 0.9     | 514 to 1,700         | 11.7 to 24.5        | 18,080 to 38,354         | -23.4 to 53.8  |
|                                               | 24.9           | 47,550               | 855.8               | 1,567,584                | 21.8           |
| Alcoholic cardiomyopathy                      | 17.3 to 34.4   | 33,110 to 65,686     | 581.3 to 1,199.2    | 1,071,435 to 2,200,284   | -9.4 to 66.7   |
|                                               | 8.4            | 16,032               | 227.8               | 403,618                  | 231.1          |
| Other cardiomyopathy                          | 3.8 to 12.1    | 7,358 to 23,173      | 122.9 to 331.5      | 218,225 to 585,699       | 146.1 to 348.5 |
|                                               | 4.0            | 8,153                | 92.1                | 193,043                  | 11.9           |
| Atrial fibrillation and flutter               | 2.8 to 5.6     | 5,608 to 11,461      | 69.5 to 119.3       | 145,142 to 249,660       | -16.3 to 51.0  |
|                                               | 3.7            | 7,684                | 78.1                | 158,078                  | 285.9          |
| Aortic aneurysm                               | 2.8 to 4.8     | 5,793 to 9,970       | 57.6 to 104.1       | 116,488 to 209,248       | 203.1 to 404.1 |
|                                               | 4.6            | 9,499                | 70.7                | 149,180                  | 36.3           |
| Peripheral artery disease                     | 3.1 to 7.8     | 6,388 to 15,825      | 49.6 to 104.8       | 105,118 to 220,905       | 6.9 to 80.5    |
|                                               | 1.2            | 2,211                | 39.0                | 69,111                   | -37.7          |
| Endocarditis                                  | 0.8 to 1.9     | 1,479 to 3,622       | 26.4 to 60.2        | 46,406 to 108,352        | -53.6 to -10.1 |
|                                               | 7.1            | 14,307               | 185.3               | 357,593                  | 285.3          |
| Other cardiovascular and circulatory diseases | 5.4 to 9.2     | 10,800 to 18,825     | 139.8 to 243.5      | 269,950 to 470,970       | 188.0 to 435.8 |
|                                               | 18.0           | 37,624               | 586.7               | 1,091,075                | -69.6          |
| Chronic respiratory diseases                  | 13.7 to 22.8   | 28,675 to 47,654     | 467.9 to 725.4      | 873,206 to 1,349,157     | -76.3 to -59.5 |
|                                               | 16.0           | 33,573               | 341.4               | 703,194                  | -66.3          |
| Chronic obstructive pulmonary disease         | 12.3 to 20.2   | 25,645 to 42,469     | 265.5 to 428.5      | 545,570 to 883,291       | -74.1 to -54.5 |
|                                               | 0.1            | 221                  | 3.1                 | 6,445                    | -59.1          |
| Pneumoconiosis                                | 0.1 to 0.1     | 164 to 288           | 2.4 to 3.9          | 4,959 to 8,088           | -70.3 to -45.4 |
|                                               | 0.0            | 28                   | 0.4                 | 840                      | -71.6          |
| Silicosis                                     | 0.0 to 0.0     | 17 to 44             | 0.3 to 0.6          | 606 to 1,174             | -80.8 to -61.2 |

|                                                                |              |                  |                    |                        |                |
|----------------------------------------------------------------|--------------|------------------|--------------------|------------------------|----------------|
|                                                                | 0.0          | 29               | 0.7                | 1,332                  | -68.7          |
| Asbestosis                                                     | 0.0 to 0.0   | 15 to 43         | 0.5 to 0.9         | 962 to 1,764           | -77.7 to -57.9 |
|                                                                | 0.0          | 28               | 0.4                | 755                    | 148.5          |
| Coal workers pneumoconiosis                                    | 0.0 to 0.0   | 6 to 44          | 0.2 to 0.5         | 346 to 1,083           | 55.9 to 254.0  |
|                                                                | 0.1          | 136              | 1.7                | 3,518                  | -60.0          |
| Other pneumoconiosis                                           | 0.0 to 0.1   | 97 to 188        | 1.3 to 2.1         | 2,637 to 4,456         | -72.7 to -45.3 |
|                                                                | 1.2          | 2,377            | 209.8              | 324,927                | -87.8          |
| Asthma                                                         | 0.8 to 1.9   | 1,685 to 3,817   | 144.9 to 291.1     | 228,163 to 447,734     | -91.2 to -82.3 |
|                                                                | 0.4          | 773              | 18.2               | 33,215                 | 9.2            |
| Interstitial lung disease and pulmonary sarcoidosis            | 0.2 to 0.5   | 475 to 1,079     | 12.8 to 24.0       | 23,100 to 43,613       | -17.0 to 57.8  |
|                                                                | 0.3          | 680              | 14.2               | 23,294                 | -77.9          |
| Other chronic respiratory diseases                             | 0.2 to 0.6   | 441 to 1,194     | 10.3 to 22.2       | 16,521 to 37,157       | -83.7 to -70.5 |
|                                                                | 25.9         | 49,991           | 916.4              | 1,682,255              | 126.9          |
| Cirrhosis and other chronic liver diseases                     | 18.7 to 35.1 | 36,353 to 67,356 | 661.1 to 1,250.7   | 1,217,503 to 2,285,151 | 67.4 to 196.6  |
|                                                                | 5.1          | 9,706            | 180.7              | 331,010                | 119.8          |
| Cirrhosis and other chronic liver diseases due to hepatitis B  | 3.5 to 7.0   | 6,826 to 13,330  | 123.6 to 253.8     | 228,902 to 460,502     | 61.5 to 189.8  |
|                                                                | 6.3          | 12,185           | 225.1              | 415,086                | 131.9          |
| Cirrhosis and other chronic liver diseases due to hepatitis C  | 4.5 to 8.7   | 8,666 to 16,668  | 156.1 to 311.8     | 289,618 to 570,824     | 71.2 to 206.2  |
|                                                                | 9.2          | 17,852           | 310.4              | 579,685                | 133.3          |
| Cirrhosis and other chronic liver diseases due to alcohol use  | 6.6 to 12.6  | 12,805 to 24,322 | 221.4 to 427.6     | 415,125 to 795,671     | 73.4 to 202.3  |
|                                                                | 5.4          | 10,247           | 200.2              | 356,474                | 118.1          |
| Cirrhosis and other chronic liver diseases due to other causes | 3.8 to 7.5   | 7,166 to 14,430  | 142.2 to 279.5     | 252,391 to 498,760     | 59.5 to 211.5  |
|                                                                | 20.2         | 40,466           | 663.8              | 1,228,472              | 22.3           |
| Digestive diseases                                             | 14.5 to 26.9 | 29,239 to 53,721 | 494.6 to 866.3     | 920,190 to 1,606,379   | -6.1 to 62.2   |
|                                                                | 4.0          | 8,130            | 127.8              | 245,450                | 5.1            |
| Peptic ulcer disease                                           | 2.8 to 5.3   | 5,612 to 10,856  | 92.6 to 166.8      | 177,480 to 320,483     | -19.6 to 37.7  |
|                                                                | 0.2          | 439              | 36.4               | 59,655                 | 26.6           |
| Gastritis and duodenitis                                       | 0.1 to 0.3   | 294 to 669       | 25.0 to 51.8       | 41,689 to 84,667       | -7.9 to 73.1   |
|                                                                | 0.3          | 514              | 11.3               | 17,852                 | -75.2          |
| Appendicitis                                                   | 0.2 to 0.4   | 358 to 852       | 8.3 to 17.1        | 13,104 to 27,752       | -81.1 to -67.4 |
|                                                                | 1.6          | 3,060            | 39.5               | 70,665                 | -9.7           |
| Paralytic ileus and intestinal obstruction                     | 1.1 to 2.1   | 2,154 to 4,203   | 28.1 to 54.9       | 49,514 to 98,221       | -29.1 to 18.7  |
|                                                                | 0.6          | 1,221            | 57.0               | 101,883                | -56.6          |
| Inguinal, femoral, and abdominal hernia                        | 0.4 to 1.0   | 802 to 2,162     | 40.7 to 75.0       | 74,059 to 133,071      | -66.2 to -39.6 |
|                                                                | 0.6          | 1,121            | 29.9               | 55,679                 | 9.6            |
| Inflammatory bowel disease                                     | 0.3 to 0.8   | 650 to 1,562     | 22.5 to 38.2       | 41,925 to 71,195       | -17.1 to 52.0  |
|                                                                | 4.5          | 9,422            | 76.4               | 158,680                | 70.7           |
| Vascular intestinal disorders                                  | 3.3 to 5.9   | 6,928 to 12,464  | 55.6 to 104.7      | 115,682 to 215,803     | 30.2 to 126.0  |
|                                                                | 1.5          | 3,201            | 32.8               | 66,544                 | -32.0          |
| Gallbladder and biliary diseases                               | 1.1 to 2.1   | 2,274 to 4,363   | 24.9 to 43.1       | 50,425 to 87,453       | -47.1 to -9.1  |
|                                                                | 5.9          | 11,129           | 209.7              | 374,528                | 105.2          |
| Pancreatitis                                                   | 3.9 to 8.3   | 7,330 to 15,646  | 135.8 to 298.3     | 243,034 to 532,074     | 51.2 to 174.1  |
|                                                                | 1.1          | 2,228            | 42.9               | 77,538                 | 110.8          |
| Other digestive diseases                                       | 0.7 to 1.6   | 1,311 to 3,172   | 28.7 to 59.1       | 51,524 to 106,446      | 57.6 to 191.3  |
|                                                                | 34.0         | 67,556           | 1,380.5            | 2,393,339              | -0.8           |
| Neurological disorders                                         | 25.1 to 44.9 | 49,355 to 90,385 | 1,028.0 to 1,757.3 | 1,791,253 to 3,024,991 | -22.0 to 28.8  |
|                                                                | 28.0         | 55,562           | 325.1              | 685,106                | 1.9            |
| Alzheimer disease and other dementias                          | 20.5 to 37.4 | 39,767 to 75,905 | 243.2 to 429.3     | 508,315 to 920,093     | -19.9 to 31.2  |

|                                                     |              |                  |                    |                        |                |
|-----------------------------------------------------|--------------|------------------|--------------------|------------------------|----------------|
|                                                     | 4.0          | 8,516            | 61.8               | 131,691                | 9.5            |
| Parkinson disease                                   | 2.8 to 5.6   | 5,836 to 12,064  | 43.1 to 85.4       | 91,670 to 180,532      | -14.0 to 44.3  |
|                                                     | 0.6          | 882              | 83.2               | 120,960                | -69.3          |
| Epilepsy                                            | 0.4 to 0.7   | 636 to 1,209     | 35.3 to 162.5      | 51,274 to 236,133      | -76.7 to -59.5 |
|                                                     | 0.4          | 754              | 29.2               | 51,657                 | -10.3          |
| Multiple sclerosis                                  | 0.3 to 0.7   | 480 to 1,259     | 21.6 to 40.6       | 38,194 to 71,187       | -37.1 to 32.8  |
|                                                     | 0.2          | 486              | 8.3                | 15,218                 | 20.0           |
| Motor neuron disease                                | 0.2 to 0.3   | 357 to 655       | 6.3 to 11.0        | 11,485 to 20,363       | -10.4 to 63.8  |
|                                                     | 0.8          | 1,356            | 51.4               | 72,296                 | 18.5           |
| Other neurological disorders                        | 0.6 to 1.1   | 1,011 to 1,790   | 38.1 to 69.8       | 53,819 to 96,703       | -4.6 to 59.3   |
|                                                     | 27.6         | 49,717           | 3,429.5            | 5,609,614              | -8.5           |
| Mental and substance use disorders                  | 19.2 to 38.4 | 34,643 to 69,025 | 2,658.3 to 4,264.2 | 4,372,293 to 6,939,344 | -34.6 to 26.9  |
|                                                     | 17.3         | 31,849           | 1,119.2            | 1,930,474              | 8.2            |
| Alcohol use disorders                               | 11.8 to 24.2 | 21,704 to 44,511 | 831.6 to 1,444.9   | 1,439,473 to 2,497,401 | -23.1 to 54.8  |
|                                                     | 10.3         | 17,860           | 750.8              | 1,213,222              | -28.3          |
| Drug use disorders                                  | 7.0 to 14.1  | 12,338 to 24,473 | 562.1 to 957.7     | 910,380 to 1,543,198   | -48.1 to -1.9  |
|                                                     | 7.0          | 12,014           | 541.9              | 883,082                | -41.4          |
| Opioid use disorders                                | 4.7 to 10.1  | 8,171 to 17,340  | 406.6 to 700.8     | 662,505 to 1,138,336   | -57.3 to -19.1 |
|                                                     | 0.6          | 1,092            | 42.8               | 68,965                 | 112.7          |
| Cocaine use disorders                               | 0.2 to 0.9   | 375 to 1,626     | 23.8 to 60.0       | 37,287 to 96,464       | 24.5 to 224.5  |
|                                                     | 0.3          | 586              | 32.4               | 48,266                 | 397.3          |
| Amphetamine use disorders                           | 0.1 to 0.5   | 191 to 942       | 20.4 to 46.2       | 29,701 to 68,696       | 216.5 to 687.9 |
|                                                     | 2.3          | 4,168            | 125.2              | 202,063                | 11.9           |
| Other drug use disorders                            | 1.1 to 3.4   | 1,920 to 6,063   | 71.0 to 172.6      | 113,597 to 278,086     | -21.9 to 59.8  |
|                                                     | 0.0          | 7                | 27.4               | 36,401                 | 136.8          |
| Eating disorders                                    | 0.0 to 0.0   | 4 to 12          | 17.3 to 39.4       | 22,172 to 52,923       | 31.4 to 322.2  |
|                                                     | 0.0          | 6                | 6.6                | 7,759                  | 191.0          |
| Anorexia nervosa                                    | 0.0 to 0.0   | 3 to 10          | 3.9 to 10.1        | 4,679 to 11,941        | 49.3 to 413.1  |
|                                                     | 0.0          | 1                | 20.8               | 28,642                 | 3.4            |
| Bulimia nervosa                                     | 0.0 to 0.0   | 1 to 1           | 12.3 to 31.5       | 16,735 to 43,874       | -43.4 to 65.6  |
|                                                     | 16.0         | 32,307           | 1,102.9            | 2,043,512              | 21.5           |
| Diabetes, urogenital, blood, and endocrine diseases | 12.2 to 21.2 | 24,364 to 43,003 | 862.7 to 1,391.6   | 1,597,143 to 2,552,904 | -6.2 to 68.8   |
|                                                     | 5.6          | 11,608           | 390.3              | 778,090                | 42.9           |
| Diabetes mellitus                                   | 4.1 to 7.7   | 8,457 to 15,916  | 299.2 to 506.7     | 594,419 to 1,007,933   | 5.1 to 106.6   |
|                                                     | 0.1          | 154              | 3.2                | 5,438                  | -84.3          |
| Acute glomerulonephritis                            | 0.1 to 0.1   | 113 to 212       | 2.4 to 4.4         | 3,946 to 7,456         | -89.5 to -77.8 |
|                                                     | 5.2          | 10,369           | 228.3              | 437,645                | 17.9           |
| Chronic kidney disease                              | 4.0 to 6.8   | 7,834 to 13,595  | 184.3 to 279.7     | 353,049 to 536,102     | -7.4 to 58.7   |
|                                                     | 1.3          | 2,557            | 52.2               | 104,046                | 44.1           |
| Chronic kidney disease due to diabetes mellitus     | 0.9 to 1.7   | 1,918 to 3,381   | 41.3 to 64.3       | 82,728 to 128,062      | 10.6 to 101.8  |
|                                                     | 0.4          | 699              | 11.4               | 23,120                 | 45.0           |
| Chronic kidney disease due to hypertension          | 0.3 to 0.5   | 528 to 933       | 8.9 to 14.3        | 18,047 to 29,108       | 13.0 to 93.9   |
|                                                     | 2.0          | 3,920            | 95.8               | 177,759                | -7.1           |
| Chronic kidney disease due to glomerulonephritis    | 1.5 to 2.7   | 2,898 to 5,238   | 77.0 to 117.7      | 143,158 to 218,513     | -28.4 to 27.4  |
|                                                     | 1.6          | 3,193            | 69.0               | 132,721                | 39.7           |
| Chronic kidney disease due to other causes          | 1.2 to 2.1   | 2,412 to 4,184   | 56.0 to 84.2       | 107,550 to 162,810     | 7.7 to 88.2    |
|                                                     | 4.0          | 8,230            | 161.2              | 317,433                | 10.4           |
| Urinary diseases and male infertility               | 3.0 to 5.2   | 6,145 to 10,699  | 124.1 to 204.1     | 243,430 to 402,485     | -15.8 to 50.0  |



|                                                   |            |                |                    |                        |                  |
|---------------------------------------------------|------------|----------------|--------------------|------------------------|------------------|
|                                                   | 3.2        | 6,487          | 75.4               | 143,900                | 10.4             |
| Urinary tract infections                          | 2.3 to 4.2 | 4,826 to 8,610 | 56.2 to 100.1      | 106,436 to 190,628     | -15.8 to 51.9    |
|                                                   | 0.7        | 1,376          | 18.4               | 36,633                 | -4.7             |
| Urolithiasis                                      | 0.4 to 0.9 | 879 to 1,961   | 13.2 to 24.3       | 26,024 to 48,669       | -28.8 to 36.5    |
|                                                   | 0.2        | 367            | 8.1                | 14,336                 | 134.5            |
| Other urinary diseases                            | 0.1 to 0.3 | 153 to 557     | 5.2 to 11.0        | 8,949 to 19,581        | 57.7 to 241.6    |
|                                                   | 0.1        | 96             | 170.8              | 269,082                | 431.2            |
| Gynecological diseases                            | 0.0 to 0.1 | 28 to 167      | 117.6 to 242.3     | 184,721 to 383,211     | 212.4 to 776.6   |
|                                                   | 0.0        | 55             | 12.3               | 21,651                 | 611.1            |
| Uterine fibroids                                  | 0.0 to 0.1 | 15 to 98       | 7.0 to 21.3        | 12,141 to 37,651       | 290.7 to 1,318.8 |
|                                                   | 0.0        | 1              | 0.9                | 1,392                  | 242.5            |
| Polycystic ovarian syndrome                       | 0.0 to 0.0 | 0 to 2         | 0.4 to 1.7         | 627 to 2,612           | 11.8 to 750.1    |
|                                                   | 0.0        | 4              | 7.6                | 10,945                 | 776.8            |
| Endometriosis                                     | 0.0 to 0.0 | 1 to 9         | 4.9 to 11.2        | 6,990 to 16,294        | 113.4 to 2,069.6 |
|                                                   | 0.0        | 7              | 10.1               | 20,286                 | 23.7             |
| Genital prolapse                                  | 0.0 to 0.0 | 2 to 12        | 5.0 to 18.4        | 9,997 to 36,997        | -33.4 to 116.2   |
|                                                   | 0.0        | 29             | 86.6               | 136,643                | 639.8            |
| Other gynecological diseases                      | 0.0 to 0.0 | 9 to 51        | 57.2 to 125.3      | 89,920 to 196,333      | 308.4 to 1,134.6 |
|                                                   | 0.3        | 568            | 45.6               | 67,534                 | 65.1             |
| Hemoglobinopathies and hemolytic anemias          | 0.2 to 0.4 | 371 to 784     | 31.4 to 64.3       | 46,956 to 94,758       | 30.6 to 127.2    |
|                                                   | 0.0        | 20             | 1.7                | 1,680                  | 173.3            |
| Thalassemias                                      | 0.0 to 0.0 | 17 to 24       | 1.4 to 2.0         | 1,384 to 1,955         | 118.1 to 257.2   |
|                                                   | 0.0        | 59             | 2.5                | 3,255                  | 380.0            |
| Sickle cell disorders                             | 0.0 to 0.1 | 35 to 86       | 1.6 to 3.5         | 2,007 to 4,656         | 256.6 to 586.9   |
|                                                   | 0.0        | 74             | 2.1                | 3,235                  | 372.3            |
| G6PD deficiency                                   | 0.0 to 0.1 | 42 to 105      | 1.3 to 2.8         | 1,990 to 4,413         | 253.5 to 536.4   |
|                                                   | 0.2        | 414            | 9.1                | 15,051                 | 25.6             |
| Other hemoglobinopathies and hemolytic anemias    | 0.1 to 0.3 | 271 to 583     | 6.4 to 12.4        | 10,719 to 20,202       | -4.3 to 78.1     |
|                                                   | 0.8        | 1,282          | 103.4              | 168,291                | 51.8             |
| Endocrine, metabolic, blood, and immune disorders | 0.6 to 1.0 | 930 to 1,781   | 77.6 to 133.6      | 125,059 to 220,072     | 18.1 to 109.9    |
|                                                   | 0.9        | 1,712          | 1,841.5            | 3,436,410              | -12.5            |
| Musculoskeletal disorders                         | 0.6 to 1.3 | 1,154 to 2,473 | 1,340.1 to 2,387.9 | 2,505,473 to 4,448,011 | -40.0 to 34.8    |
|                                                   | 0.3        | 704            | 77.6               | 149,755                | -4.7             |
| Rheumatoid arthritis                              | 0.2 to 0.6 | 439 to 1,179   | 55.4 to 101.1      | 107,111 to 195,311     | -39.2 to 51.6    |
|                                                   | 0.5        | 1,007          | 96.1               | 166,406                | -16.3            |
| Other musculoskeletal disorders                   | 0.3 to 0.8 | 592 to 1,493   | 66.6 to 139.1      | 116,464 to 238,168     | -40.5 to 26.6    |
|                                                   | 5.9        | 7,172          | 2,515.9            | 3,953,186              | -44.7            |
| Other non-communicable diseases                   | 4.7 to 7.0 | 5,370 to 8,885 | 1,869.6 to 3,376.9 | 2,874,026 to 5,391,549 | -53.0 to -34.5   |
|                                                   | 4.5        | 4,930          | 521.3              | 597,951                | -56.5            |
| Congenital birth defects                          | 3.8 to 5.8 | 4,174 to 6,440 | 447.5 to 631.9     | 512,868 to 718,121     | -62.6 to -49.5   |
|                                                   | 0.1        | 80             | 24.0               | 32,167                 | -92.3            |
| Neural tube defects                               | 0.1 to 0.1 | 62 to 107      | 18.5 to 30.5       | 24,453 to 41,397       | -94.3 to -89.4   |
|                                                   | 2.2        | 2,462          | 181.9              | 195,637                | -67.9            |
| Congenital heart anomalies                        | 1.8 to 3.2 | 1,989 to 3,581 | 147.8 to 259.5     | 159,996 to 278,112     | -73.3 to -61.0   |
|                                                   | 0.0        | 6              | 0.9                | 1,044                  | -82.0            |
| Orofacial clefts                                  | 0.0 to 0.0 | 4 to 13        | 0.6 to 1.4         | 728 to 1,570           | -92.9 to -56.4   |
|                                                   | 0.2        | 191            | 20.6               | 25,488                 | 118.1            |
| Down syndrome                                     | 0.1 to 0.2 | 135 to 248     | 15.3 to 25.9       | 19,523 to 32,039       | 70.0 to 166.3    |

|                                               |               |                    |                    |                         |                    |
|-----------------------------------------------|---------------|--------------------|--------------------|-------------------------|--------------------|
|                                               | 0.2           | 218                | 34.5               | 34,466                  | 398.0              |
| Other chromosomal abnormalities               | 0.1 to 0.3    | 124 to 293         | 26.3 to 43.6       | 25,673 to 43,444        | 216.0 to 584.3     |
|                                               | 0.1           | 80                 | 57.8               | 82,961                  | -51.9              |
| Congenital musculoskeletal and limb anomalies | 0.1 to 0.2    | 54 to 201          | 40.7 to 78.1       | 58,426 to 112,211       | -63.8 to -38.0     |
|                                               | 0.1           | 81                 | 10.4               | 11,184                  | -23.8              |
| Urogenital congenital anomalies               | 0.0 to 0.1    | 54 to 142          | 7.4 to 15.2        | 8,009 to 16,322         | -43.3 to -1.3      |
|                                               | 0.4           | 442                | 42.8               | 47,047                  | -50.0              |
| Digestive congenital anomalies                | 0.3 to 0.7    | 310 to 705         | 31.8 to 64.0       | 35,263 to 68,921        | -65.1 to -34.2     |
|                                               | 1.3           | 1,369              | 146.4              | 165,533                 | -10.7              |
| Other congenital birth defects                | 0.9 to 1.6    | 989 to 1,648       | 114.8 to 175.8     | 129,935 to 201,382      | -22.3 to 7.5       |
|                                               | 0.9           | 1,828              | 737.5              | 1,000,465               | 2,977.4            |
| Skin and subcutaneous diseases                | 0.2 to 1.6    | 361 to 3,164       | 505.4 to 1,059.6   | 683,909 to 1,435,187    | 2,237.6 to 4,171.5 |
|                                               | 0.7           | 1,286              | 23.4               | 42,265                  | 2,683.3            |
| Cellulitis                                    | 0.1 to 1.1    | 270 to 2,161       | 7.2 to 37.7        | 12,297 to 68,371        | 2,026.6 to 3,768.5 |
|                                               | 0.2           | 437                | 8.5                | 15,340                  | 5,780.7            |
| Pyoderma                                      | 0.0 to 0.4    | 63 to 839          | 2.5 to 14.7        | 4,304 to 26,728         | 4,276.5 to 8,683.5 |
|                                               | 0.0           | 67                 | 5.9                | 10,784                  | 1,581.2            |
| Decubitus ulcer                               | 0.0 to 0.1    | 14 to 115          | 4.1 to 8.0         | 7,530 to 14,837         | 1,109.2 to 2,248.2 |
|                                               | 0.0           | 38                 | 41.9               | 72,438                  | 1,634.2            |
| Other skin and subcutaneous diseases          | 0.0 to 0.0    | 8 to 69            | 20.4 to 76.1       | 35,403 to 131,068       | 1,193.4 to 2,355.2 |
|                                               | 0.4           | 414                | 34.7               | 35,646                  | -33.8              |
| Sudden infant death syndrome                  | 0.3 to 0.5    | 297 to 565         | 24.9 to 47.4       | 25,612 to 48,712        | -58.3 to 4.2       |
|                                               | 103.0         | 174,721            | 5,950.9            | 9,566,861               | -27.5              |
| Injuries                                      | 72.6 to 139.7 | 123,196 to 237,982 | 4,494.5 to 7,748.4 | 7,199,469 to 12,563,169 | -44.9 to -4.9      |
|                                               | 19.8          | 31,576             | 1,187.9            | 1,810,217               | -25.1              |
| Transport injuries                            | 14.1 to 27.0  | 22,355 to 43,035   | 879.1 to 1,544.9   | 1,339,060 to 2,345,458  | -44.3 to -0.5      |
|                                               | 17.8          | 28,198             | 1,078.5            | 1,644,223               | -25.2              |
| Road injuries                                 | 12.7 to 24.2  | 19,946 to 38,155   | 804.5 to 1,397.8   | 1,225,271 to 2,120,945  | -44.6 to -1.6      |
|                                               | 5.7           | 9,632              | 297.1              | 464,853                 | -49.2              |
| Pedestrian road injuries                      | 4.0 to 7.9    | 6,837 to 13,296    | 219.2 to 402.3     | 341,588 to 627,684      | -66.2 to -25.1     |
|                                               | 0.4           | 730                | 53.7               | 89,329                  | -26.5              |
| Cyclist road injuries                         | 0.3 to 0.6    | 500 to 1,034       | 39.9 to 69.5       | 65,752 to 116,834       | -47.7 to -0.7      |
|                                               | 1.2           | 1,787              | 86.4               | 125,785                 | -16.0              |
| Motorcyclist road injuries                    | 0.8 to 1.7    | 1,180 to 2,523     | 62.5 to 115.9      | 91,604 to 167,470       | -44.8 to 29.8      |
|                                               | 10.3          | 15,906             | 628.6              | 942,893                 | -0.6               |
| Motor vehicle road injuries                   | 7.2 to 14.2   | 10,882 to 22,036   | 461.1 to 837.3     | 689,477 to 1,252,947    | -28.0 to 39.7      |
|                                               | 0.1           | 144                | 12.6               | 21,361                  | -43.4              |
| Other road injuries                           | 0.1 to 0.1    | 96 to 220          | 9.1 to 17.0        | 15,372 to 29,077        | -60.3 to -17.2     |
|                                               | 2.1           | 3,378              | 109.5              | 165,995                 | -24.2              |
| Other transport injuries                      | 1.4 to 2.9    | 2,343 to 4,767     | 77.7 to 150.2      | 117,799 to 227,566      | -44.7 to 6.4       |
|                                               | 37.8          | 66,483             | 2,642.9            | 4,394,584               | -46.6              |
| Unintentional injuries                        | 27.4 to 52.5  | 47,724 to 93,400   | 2,062.3 to 3,384.9 | 3,409,972 to 5,670,803  | -59.1 to -31.1     |
|                                               | 7.4           | 13,622             | 903.7              | 1,591,635               | -18.3              |
| Falls                                         | 5.3 to 10.0   | 9,803 to 18,232    | 677.9 to 1,173.5   | 1,197,314 to 2,067,549  | -38.8 to 5.7       |
|                                               | 6.4           | 10,083             | 319.0              | 460,939                 | -65.9              |
| Drowning                                      | 4.5 to 8.5    | 7,063 to 13,606    | 233.3 to 421.5     | 328,292 to 613,051      | -75.2 to -55.3     |
|                                               | 4.7           | 8,429              | 251.8              | 415,319                 | -32.9              |
| Fire, heat, and hot substances                | 3.3 to 6.3    | 5,972 to 11,391    | 194.0 to 322.6     | 315,189 to 537,251      | -50.1 to -8.4      |

|                                                                              |              |                   |                    |                        |                |
|------------------------------------------------------------------------------|--------------|-------------------|--------------------|------------------------|----------------|
| Poisonings                                                                   | 1.5          | 2,351             | 84.0               | 118,267                | -47.1          |
|                                                                              | 1.1 to 2.2   | 1,639 to 3,593    | 62.8 to 112.0      | 86,918 to 166,260      | -61.5 to -29.4 |
| Exposure to mechanical forces                                                | 3.0          | 4,875             | 273.4              | 440,327                | -47.7          |
|                                                                              | 2.1 to 4.2   | 3,375 to 6,905    | 208.3 to 359.8     | 334,627 to 577,452     | -63.4 to -24.7 |
| Unintentional firearm injuries                                               | 0.5          | 785               | 23.5               | 37,080                 | -46.1          |
|                                                                              | 0.3 to 0.7   | 542 to 1,107      | 16.7 to 33.0       | 26,374 to 51,339       | -59.8 to -23.2 |
| Unintentional suffocation                                                    | 0.6          | 775               | 43.2               | 56,766                 | -25.0          |
|                                                                              | 0.4 to 0.9   | 550 to 1,205      | 31.4 to 68.7       | 41,757 to 85,727       | -43.0 to 2.5   |
| Other exposure to mechanical forces                                          | 1.9          | 3,315             | 206.7              | 346,480                | -51.6          |
|                                                                              | 1.3 to 2.9   | 2,221 to 4,909    | 154.9 to 276.4     | 259,110 to 463,095     | -68.0 to -26.3 |
| Adverse effects of medical treatment                                         | 1.2          | 2,193             | 45.5               | 74,917                 | 13.0           |
|                                                                              | 0.8 to 1.7   | 1,515 to 3,112    | 32.1 to 62.2       | 52,477 to 103,314      | -11.9 to 54.4  |
| Animal contact                                                               | 0.2          | 406               | 25.9               | 41,337                 | -24.5          |
|                                                                              | 0.2 to 0.4   | 270 to 703        | 19.0 to 34.8       | 30,084 to 55,918       | -43.9 to -1.5  |
| Venomous animal contact                                                      | 0.1          | 241               | 17.8               | 28,029                 | -26.3          |
|                                                                              | 0.1 to 0.2   | 152 to 435        | 12.6 to 24.2       | 19,693 to 38,158       | -46.4 to -1.9  |
| Non-venomous animal contact                                                  | 0.1          | 165               | 8.1                | 13,308                 | -21.6          |
|                                                                              | 0.1 to 0.2   | 99 to 290         | 5.7 to 11.4        | 9,307 to 18,687        | -39.1 to 5.6   |
| Foreign body                                                                 | 4.3          | 7,534             | 228.2              | 364,526                | -31.6          |
|                                                                              | 3.0 to 6.6   | 5,224 to 11,800   | 169.6 to 331.4     | 267,385 to 536,118     | -49.2 to -9.4  |
| Pulmonary aspiration and foreign body in airway                              | 4.0          | 7,140             | 204.4              | 326,227                | -30.9          |
|                                                                              | 2.8 to 6.3   | 4,945 to 11,258   | 151.9 to 303.5     | 238,313 to 490,925     | -48.8 to -8.8  |
| Foreign body in other body part                                              | 0.2          | 394               | 21.2               | 34,170                 | -40.6          |
|                                                                              | 0.2 to 0.4   | 269 to 674        | 15.3 to 29.6       | 24,677 to 48,094       | -56.8 to -13.6 |
| Environmental heat and cold exposure                                         | 7.2          | 13,648            | 337.9              | 608,816                | -56.7          |
|                                                                              | 4.5 to 13.7  | 8,568 to 26,341   | 229.6 to 585.3     | 412,402 to 1,064,979   | -68.6 to -40.1 |
| Other unintentional injuries                                                 | 2.0          | 3,343             | 173.5              | 278,501                | -45.1          |
|                                                                              | 1.4 to 2.7   | 2,341 to 4,515    | 131.0 to 223.3     | 209,355 to 359,674     | -66.9 to -21.2 |
| Self-harm and interpersonal violence                                         | 45.3         | 76,597            | 2,110.5            | 3,346,754              | 0.5            |
|                                                                              | 30.9 to 64.5 | 52,506 to 108,524 | 1,452.7 to 3,006.9 | 2,304,954 to 4,762,368 | -27.2 to 34.2  |
| Self-harm                                                                    | 30.6         | 52,001            | 1,363.4            | 2,160,200              | -1.9           |
|                                                                              | 20.6 to 43.6 | 35,189 to 75,088  | 904.8 to 1,934.0   | 1,447,926 to 3,076,816 | -30.7 to 32.4  |
| Self-harm by firearm                                                         | 1.1          | 1,923             | 47.8               | 77,446                 | -9.2           |
|                                                                              | 0.6 to 1.8   | 1,104 to 3,106    | 26.8 to 75.6       | 43,926 to 123,440      | -39.9 to 28.9  |
| Self-harm by other specified means                                           | 29.5         | 50,078            | 1,315.6            | 2,082,754              | -1.6           |
|                                                                              | 19.9 to 42.2 | 33,911 to 72,349  | 874.4 to 1,870.2   | 1,400,016 to 2,996,503 | -30.4 to 32.5  |
| Interpersonal violence                                                       | 14.7         | 24,596            | 747.1              | 1,186,550              | 6.4            |
|                                                                              | 8.4 to 23.5  | 14,019 to 39,655  | 464.8 to 1,154.9   | 730,943 to 1,847,659   | -22.5 to 41.8  |
| Physical violence by firearm                                                 | 1.1          | 1,673             | 54.5               | 83,049                 | -9.9           |
|                                                                              | 0.4 to 3.0   | 708 to 4,760      | 23.4 to 158.6      | 35,089 to 241,588      | -43.2 to 46.1  |
| Physical violence by sharp object                                            | 5.1          | 8,462             | 252.9              | 397,101                | -7.1           |
|                                                                              | 2.7 to 8.8   | 4,522 to 14,450   | 139.0 to 427.7     | 217,899 to 676,978     | -36.3 to 25.6  |
| Physical violence by other means                                             | 8.5          | 14,462            | 428.7              | 691,042                | 20.2           |
|                                                                              | 4.8 to 13.5  | 8,120 to 22,970   | 264.1 to 650.4     | 422,799 to 1,046,558   | -14.4 to 64.9  |
| Forces of nature, conflict and terrorism, and executions and police conflict | 0.0          | 65                | 9.6                | 15,327                 | 13.7           |
|                                                                              | 0.0 to 0.1   | 39 to 99          | 3.7 to 23.6        | 5,799 to 37,856        | -32.9 to 80.0  |
| Exposure to forces of nature                                                 | 0.0          | 0                 | 1.6                | 2,732                  | -              |
|                                                                              | 0.0 to 0.0   | 0 to 0            | 0.4 to 4.3         | 617 to 7,358           | -              |

|                                |                   |                |                    |                          |                       |
|--------------------------------|-------------------|----------------|--------------------|--------------------------|-----------------------|
| Conflict and terrorism         | 0.0<br>0.0 to 0.0 | 0<br>0 to 0    | 5.6<br>1.3 to 16.4 | 8,910<br>2,072 to 26,044 | -                     |
| Executions and police conflict | 0.0<br>0.0 to 0.1 | 65<br>39 to 99 | 2.5<br>1.5 to 3.7  | 3,685<br>2,225 to 5,580  | 13.7<br>-32.9 to 80.0 |

**Appendix Table 2A.** Percent of total deaths attributable to risks at Level 3 of the GBD hierarchy in 2016, for males age 15 to 49 years in Russia, China, Finland, Germany, Japan, Kazakhstan, Ukraine, and United States. Risks attributable to less than 1% of total deaths in Russia are not shown

| Level 3 Risk Factor                     | Russian Federation |             | China   |             | Finland |             | Germany |             | Japan   |            | Kazakhstan |             | Ukraine |             | United States |             |
|-----------------------------------------|--------------------|-------------|---------|-------------|---------|-------------|---------|-------------|---------|------------|------------|-------------|---------|-------------|---------------|-------------|
|                                         | Percent            | 95% UI      | Percent | 95% UI      | Percent | 95% UI      | Percent | 95% UI      | Percent | 95% UI     | Percent    | 95% UI      | Percent | 95% UI      | Percent       | 95% UI      |
| Alcohol use                             | 34.4%              | (29.5-38.6) | 14.9%   | (12.5-17.7) | 30.9%   | (25.5-35.8) | 20.0%   | (15.2-24.9) | 10.3%   | (4.3-15.4) | 25.4%      | (19.6-31.2) | 33.1%   | (28.5-37.9) | 18.2%         | (14.1-22.4) |
| Smoking                                 | 13.0%              | (11.4-14.6) | 15.4%   | (11.7-20.3) | 4.7%    | (3.6-5.8)   | 14.0%   | (11.6-16.0) | 11.0%   | (9.2-12.9) | 15.3%      | (13.4-17.1) | 15.3%   | (13.2-17.3) | 8.1%          | (7.0-9.0)   |
| Drug use                                | 10.6%              | (9.0-12.3)  | 3.0%    | (2.6-3.8)   | 14.5%   | (11.4-17.3) | 7.4%    | (6.2-8.6)   | 5.2%    | (4.5-6.2)  | 6.1%       | (5.4-6.9)   | 9.9%    | (8.5-11.6)  | 15.9%         | (14.7-17.3) |
| High systolic blood pressure            | 9.0%               | (7.2-10.7)  | 12.5%   | (10.5-14.4) | 7.3%    | (5.9-8.8)   | 8.9%    | (7.1-10.6)  | 10.7%   | (8.8-12.5) | 12.4%      | (10.3-14.4) | 13.3%   | (11.1-15.2) | 7.5%          | (6.1-8.8)   |
| High total cholesterol                  | 7.9%               | (6.7-9.0)   | 7.7%    | (6.8-8.6)   | 5.0%    | (4.0-6.2)   | 8.2%    | (6.8-9.5)   | 6.8%    | (6.0-7.6)  | 10.1%      | (8.7-11.7)  | 10.4%   | (8.9-12.0)  | 7.2%          | (6.5-8.0)   |
| High body-mass index                    | 7.0%               | (4.5-9.3)   | 8.3%    | (4.2-12.9)  | 6.3%    | (4.0-8.5)   | 8.7%    | (5.4-11.6)  | 6.5%    | (3.5-9.6)  | 7.9%       | (4.5-11.3)  | 7.7%    | (4.6-10.8)  | 11.7%         | (8.9-14.0)  |
| Diet low in whole grains                | 4.9%               | (3.4-6.6)   | 6.4%    | (4.5-8.7)   | 3.2%    | (2.1-4.4)   | 4.2%    | (2.8-5.9)   | 5.5%    | (3.8-7.2)  | 6.6%       | (4.6-8.6)   | 6.2%    | (4.3-8.4)   | 4.6%          | (3.2-6.0)   |
| Diet low in fruits                      | 3.7%               | (2.2-5.3)   | 6.3%    | (4.1-8.7)   | 2.4%    | (1.4-3.5)   | 3.7%    | (2.2-5.4)   | 5.8%    | (3.8-7.8)  | 5.3%       | (3.2-7.6)   | 5.2%    | (3.1-7.4)   | 3.0%          | (1.8-4.5)   |
| Diet low in nuts and seeds              | 3.4%               | (2.1-4.6)   | 3.8%    | (2.5-5.1)   | 2.4%    | (1.6-3.4)   | 3.2%    | (1.9-4.6)   | 3.1%    | (2.0-4.3)  | 4.6%       | (2.9-6.4)   | 3.2%    | (2.2-3.3)   | 2.0%          | (1.2-3.3)   |
| High fasting plasma glucose             | 3.3%               | (2.1-4.8)   | 5.1%    | (3.7-6.9)   | 2.7%    | (2.0-3.6)   | 3.0%    | (2.3-4.1)   | 3.5%    | (2.5-4.9)  | 3.0%       | (1.9-4.5)   | 2.4%    | (1.4-3.7)   | 4.7%          | (3.9-5.9)   |
| Ambient particulate matter pollution    | 3.2%               | (2.5-4.0)   | 7.2%    | (6.1-8.3)   | 1.0%    | (0.6-1.5)   | 2.8%    | (2.0-3.8)   | 3.2%    | (2.4-3.9)  | 4.4%       | (3.5-5.4)   | 4.4%    | (3.4-5.4)   | 2.1%          | (1.5-2.7)   |
| Unsafe sex                              | 2.9%               | (1.7-4.5)   | 1.5%    | (1.3-1.6)   | 0.1%    | (0.1-0.1)   | 0.7%    | (0.6-0.9)   | 0.1%    | (0.1-0.1)  | 0.4%       | (0.3-0.6)   | 4.3%    | (2.9-6.2)   | 1.5%          | (1.5-1.6)   |
| Diet low in vegetables                  | 2.4%               | (1.1-4.0)   | 2.1%    | (0.8-3.7)   | 1.8%    | (0.9-2.9)   | 2.6%    | (1.2-4.2)   | 1.2%    | (0.3-2.5)  | 0.9%       | (0.0-2.7)   | 1.6%    | (0.3-3.4)   | 2.3%          | (1.0-3.7)   |
| Diet low in legumes                     | 2.1%               | (0.9-3.3)   | 2.0%    | (0.9-3.2)   | 1.4%    | (0.6-2.2)   | 2.3%    | (1.0-3.5)   | 0.4%    | (0.1-0.9)  | 3.3%       | (1.5-5.1)   | 2.8%    | (1.3-4.5)   | 1.8%          | (0.8-2.8)   |
| Diet low in seafood omega-3 fatty acids | 2.1%               | (0.9-3.5)   | 2.9%    | (1.3-4.5)   | 1.4%    | (0.6-2.4)   | 2.3%    | (1.0-3.8)   | 0.0%    | (0.0-0.1)  | 3.0%       | (1.2-5.0)   | 3.4%    | (1.4-5.5)   | 1.8%          | (0.7-3.0)   |
| Diet low in fiber                       | 1.7%               | (0.9-2.7)   | 2.0%    | (1.2-2.9)   | 1.2%    | (0.7-1.9)   | 2.0%    | (1.1-3.0)   | 1.6%    | (0.9-2.5)  | 2.4%       | (1.3-3.7)   | 2.3%    | (1.2-3.5)   | 1.4%          | (0.7-2.2)   |
| Impaired kidney function                | 1.5%               | (1.2-1.9)   | 3.0%    | (2.6-3.5)   | 0.6%    | (0.5-0.8)   | 1.0%    | (0.8-1.2)   | 1.8%    | (1.6-2.1)  | 2.5%       | (2.1-3.0)   | 1.9%    | (1.5-2.4)   | 1.9%          | (1.7-2.1)   |
| Diet high in sodium                     | 1.4%               | (0.0-3.3)   | 5.8%    | (2.9-9.1)   | 1.2%    | (0.0-2.7)   | 1.6%    | (0.0-3.8)   | 3.4%    | (1.2-6.3)  | 3.1%       | (0.3-6.7)   | 2.0%    | (0.1-4.6)   | 2.3%          | (0.5-4.5)   |
| Occupational carcinogens                | 1.0%               | (0.7-1.4)   | 2.3%    | (1.8-2.9)   | 0.8%    | (0.6-1.1)   | 1.9%    | (1.4-2.5)   | 2.1%    | (1.6-2.6)  | 1.8%       | (1.4-2.4)   | 1.1%    | (0.7-1.4)   | 1.3%          | (0.9-1.6)   |

**Appendix Table 2b.** Percent of total deaths attributable to risks at Level 3 of the GBD hierarchy in 2016, for females age 15 to 49 years in Russia, China, Finland, Germany, Japan, Kazakhstan, Ukraine, and United States. Risks attributable to less than 1% of total deaths in Russia are not shown

| Level 3 Risk Factor                     | Russian Federation |             | China   |            | Finland |             | Germany |             | Japan   |            | Kazakhstan |             | Ukraine |             | United States |             |
|-----------------------------------------|--------------------|-------------|---------|------------|---------|-------------|---------|-------------|---------|------------|------------|-------------|---------|-------------|---------------|-------------|
|                                         | Percent            | 95% UI      | Percent | 95% UI     | Percent | 95% UI      | Percent | 95% UI      | Percent | 95% UI     | Percent    | 95% UI      | Percent | 95% UI      | Percent       | 95% UI      |
| Alcohol use                             | 20.1%              | (17.1-23.4) | 2.2%    | (1.6-2.9)  | 17.2%   | (13.7-20.7) | 14.3%   | (11.3-17.4) | 10.9%   | (6.4-14.9) | 17.9%      | (13.9-22.3) | 21.9%   | (17.7-26.1) | 10.1%         | (7.8-12.6)  |
| High body-mass index                    | 8.1%               | (6.1-10.0)  | 8.2%    | (4.2-12.7) | 5.5%    | (4.1-6.9)   | 6.1%    | (4.5-7.7)   | 2.9%    | (1.3-4.9)  | 11.5%      | (8.4-14.5)  | 8.9%    | (6.3-11.4)  | 10.9%         | (9.0-12.5)  |
| Smoking                                 | 7.8%               | (6.5-9.3)   | 4.0%    | (1.8-7.8)  | 4.7%    | (3.5-6.0)   | 12.8%   | (10.8-15.0) | 4.5%    | (3.8-5.4)  | 6.3%       | (4.8-7.9)   | 8.1%    | (6.3-9.9)   | 9.8%          | (8.9-10.9)  |
| Drug use                                | 7.7%               | (6.3-9.8)   | 2.1%    | (1.8-2.7)  | 7.0%    | (5.7-8.5)   | 3.7%    | (3.1-4.4)   | 2.9%    | (2.6-3.3)  | 3.9%       | (3.5-4.3)   | 9.1%    | (7.3-11.3)  | 12.4%         | (11.8-13.1) |
| High systolic blood pressure            | 7.6%               | (6.1-9.1)   | 9.9%    | (8.0-11.6) | 5.2%    | (4.1-6.5)   | 4.9%    | (3.5-6.2)   | 5.0%    | (3.9-6.1)  | 10.1%      | (8.1-12.1)  | 10.0%   | (8.2-11.6)  | 5.3%          | (4.3-6.5)   |
| Unsafe sex                              | 6.3%               | (4.9-8.7)   | 4.5%    | (3.1-5.0)  | 1.1%    | (1.0-1.3)   | 3.4%    | (3.0-3.9)   | 4.2%    | (3.9-4.5)  | 4.2%       | (3.8-4.8)   | 8.9%    | (6.7-12.2)  | 3.3%          | (3.1-3.4)   |
| High total cholesterol                  | 5.7%               | (4.9-6.6)   | 5.9%    | (5.1-6.8)  | 2.2%    | (1.7-2.7)   | 3.6%    | (3.0-4.4)   | 2.9%    | (2.6-3.2)  | 7.2%       | (6.1-8.3)   | 7.4%    | (6.3-8.6)   | 4.9%          | (4.4-5.5)   |
| Diet low in whole grains                | 4.7%               | (3.5-6.1)   | 5.9%    | (4.1-7.9)  | 3.0%    | (2.2-3.9)   | 3.1%    | (2.2-4.2)   | 3.4%    | (2.4-4.5)  | 6.4%       | (4.8-8.2)   | 5.6%    | (4.1-7.3)   | 4.2%          | (3.1-5.5)   |
| Diet low in fruits                      | 3.5%               | (2.3-5.0)   | 5.5%    | (3.4-7.6)  | 2.3%    | (1.5-3.4)   | 3.0%    | (1.8-4.2)   | 3.9%    | (2.6-5.2)  | 5.4%       | (3.5-7.3)   | 4.7%    | (2.9-6.5)   | 3.0%          | (1.9-4.2)   |
| High fasting plasma glucose             | 2.8%               | (1.9-4.1)   | 5.2%    | (4.0-6.7)  | 2.6%    | (1.9-3.5)   | 2.5%    | (1.8-3.4)   | 2.6%    | (1.8-3.7)  | 3.4%       | (2.5-4.8)   | 2.8%    | (1.9-3.8)   | 5.7%          | (4.6-6.9)   |
| Ambient particulate matter pollution    | 2.7%               | (2.2-3.4)   | 6.9%    | (5.8-8.0)  | 0.7%    | (0.5-1.1)   | 2.2%    | (1.6-2.7)   | 2.1%    | (1.6-2.6)  | 3.8%       | (3.1-4.6)   | 3.5%    | (2.8-4.3)   | 1.9%          | (1.4-2.4)   |
| Diet low in nuts and seeds              | 2.4%               | (1.5-3.2)   | 3.1%    | (2.1-4.2)  | 1.2%    | (0.8-1.6)   | 1.5%    | (0.9-2.1)   | 1.3%    | (0.9-1.8)  | 3.2%       | (2.1-4.3)   | 3.6%    | (2.4-4.8)   | 1.8%          | (1.0-2.6)   |
| Diet low in vegetables                  | 2.2%               | (1.0-3.5)   | 2.1%    | (0.8-3.6)  | 1.4%    | (0.7-2.3)   | 1.8%    | (0.9-2.8)   | 0.9%    | (0.3-1.8)  | 1.0%       | (0.0-2.6)   | 1.5%    | (0.3-2.9)   | 1.9%          | (0.9-3.0)   |
| Impaired kidney function                | 1.9%               | (1.6-2.2)   | 4.0%    | (3.5-4.6)  | 0.8%    | (0.6-1.0)   | 1.0%    | (0.9-1.2)   | 1.6%    | (1.4-1.9)  | 3.5%       | (3.1-4.0)   | 2.2%    | (1.8-2.6)   | 2.5%          | (2.3-2.7)   |
| Diet low in seafood omega-3 fatty acids | 1.5%               | (0.6-2.5)   | 2.3%    | (1.0-3.6)  | 0.6%    | (0.3-1.1)   | 1.1%    | (0.5-1.7)   | 0.0%    | (0.0-0.1)  | 2.1%       | (0.9-3.5)   | 2.4%    | (1.0-3.8)   | 1.3%          | (0.5-2.2)   |
| Diet low in legumes                     | 1.5%               | (0.7-2.3)   | 1.7%    | (0.8-2.7)  | 0.6%    | (0.3-1.0)   | 1.0%    | (0.5-1.6)   | 0.2%    | (0.1-0.5)  | 2.3%       | (1.0-3.5)   | 2.1%    | (0.9-3.3)   | 1.3%          | (0.6-2.1)   |
| Diet low in fiber                       | 1.5%               | (0.9-2.2)   | 1.9%    | (1.2-2.7)  | 0.9%    | (0.5-1.3)   | 1.3%    | (0.8-1.9)   | 1.3%    | (0.6-1.6)  | 2.0%       | (1.2-2.9)   | 1.1%    | (0.6-1.8)   | 1.2%          | (0.6-1.8)   |
| Occupational carcinogens                | 1.2%               | (0.8-1.5)   | 1.9%    | (1.5-2.3)  | 1.0%    | (0.7-1.2)   | 1.9%    | (1.5-2.4)   | 1.7%    | (1.3-2.1)  | 1.8%       | (1.4-2.3)   | 1.2%    | (0.9-1.5)   | 1.7%          | (1.3-2.1)   |
| Secondhand smoke                        | 1.1%               | (0.8-1.5)   | 3.8%    | (2.9-4.7)  | 0.5%    | (0.3-0.7)   | 0.6%    | (0.4-0.8)   | 1.2%    | (0.9-1.5)  | 2.7%       | (2.1-3.4)   | 1.4%    | (1.0-1.8)   | 0.6%          | (0.4-0.7)   |
